# Supplementary material for: Unexpected isocyanide-based three-component bicyclization for the stereoselective synthesis of densely functionalized pyrano[3,4-c]pyrroles
Source: Royal Society of Chemistry journal article supplement (doi:10.1039/c5cc08071a), 2015-11-06
Supplement: c5cc08071a1.pdf [file c5cc08071a1.pdf]

## Supporting Information

### Unexpected isocyanide-based three-component bicyclizations for stereoselective synthesis of densely functionalized pyrano[3,4-c]pyrroles

Qian Gao,<sup>a</sup> Wen-Juan Hao,<sup>a</sup> Feng Liu,<sup>a</sup> Shu-Jiang Tu,<sup>\*,a</sup> Shu-Liang Wang,<sup>a</sup> Guigen Li<sup>\*,b,c</sup> and Bo Jiang<sup>\*,a</sup>

<sup>a</sup>School of Chemistry and Chemical Engineering, Jiangsu Key Laboratory of Green Synthetic Chemistry for Functional Materials, Jiangsu Normal University, Xuzhou 221116, P. R. China. Email: laotu@jsnu.edu.cn (SJT); jiangchem@jsnu.edu.cn (BJ) Fax: +8651683500065; Tel: +8651683500065

<sup>b</sup>Institute of Chemistry & Biomedical Sciences, Collaborative Innovation Center of Chemistry for Life Sciences, Nanjing University, Nanjing 210093, P. R. China.

<sup>c</sup>Department of Chemistry and Biochemistry, Texas Tech University, Lubbock, Texas 79409-1061, United States. Email: guigen.li@ttu.edu.cn (GL)

#### Table of Contents

|                                                                                           |         |
|-------------------------------------------------------------------------------------------|---------|
| General information-----                                                                  | S1      |
| X-ray Crystallography Structure of Compounds <b>4b</b> -----                              | S2      |
| Hydrogen-Deuterium Exchange Experiment for Compound <b>4a</b> -----                       | S2      |
| Copy of <sup>1</sup> H NMR Spectra for Deuterated Compounds <b>4a</b> -----               | S3      |
| General Procedure for the Synthesis of Compounds <b>4a</b> -----                          | S3      |
| Characterization Data of Compounds <b>4a-4w</b> -----                                     | S4-S14  |
| Copies of <sup>1</sup> H and <sup>13</sup> C NMR Spectra for Compounds <b>4a-4w</b> ----- | S15-S36 |



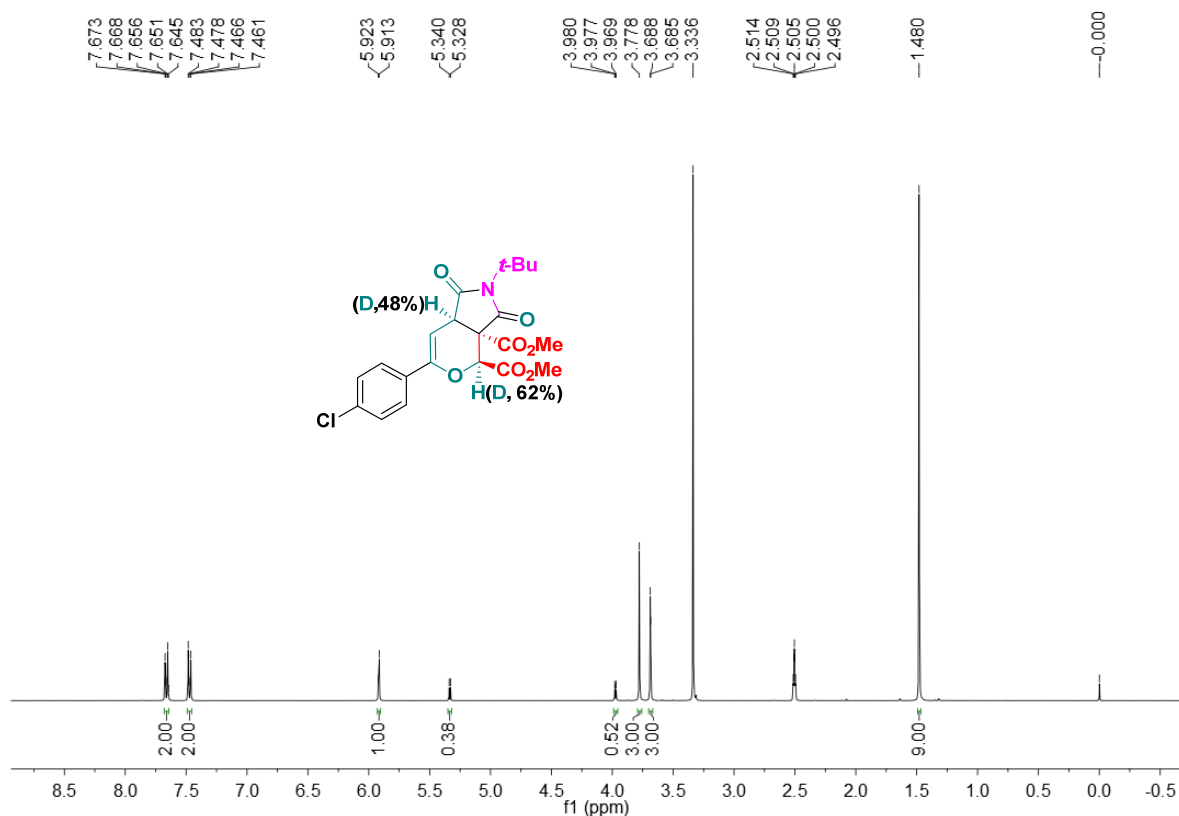

**<sup>1</sup>H NMR of Compound 4a via Hydrogen-Deuterium Exchange**

### General Procedure for the Synthesis of Products 4

Example for the synthesis of **4a**: Dimethyl 2-(*tert*-butyl)-6-(4-chlorophenyl)-1,3-dioxo-1,2,3,3a,4,7a-hexahydropyrano[3,4-*c*]pyrrole-3a,4-dicarboxylate

4-(4-chlorophenyl)-4-oxobut-2-enoic acid (**1a**, 0.5 mmol), dimethyl but-2-ynedioate **2a** (0.6 mmol, 1.2 equiv) and *t*-butyl isonitrile **3a** (0.6 mmol, 1.2 equiv) were introduced into a 25-mL Schlenk reaction flask, CH<sub>3</sub>CN (4.0 mL) was then successively added into this reaction mixture. The reaction system was stirred at 80 °C for 6.0 hours. After completion of the reaction as indicated by TLC, the solvent was removed under vacuum. The residue was separated by column chromatography on silica gel (eluent, petroleum ether/ethyl acetate 10:1 v/v) to afford the pure white solid **4a**.

**Dimethyl 2-(*tert*-butyl)-6-(4-chlorophenyl)-1,3-dioxo-1,2,3,3a,4,7a-hexahydropyrano[3,4-*c*]pyrrole-3a,4-dicarboxylate (4a)**

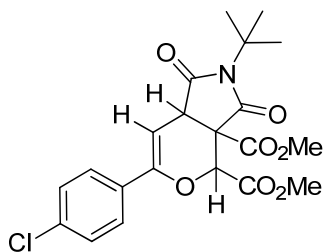

White solid, mp: 147-148 °C.

IR (KBr,  $\nu$ ,  $\text{cm}^{-1}$ ): 2977, 2957, 1751, 1707, 1492, 1435, 1357, 1334, 1253, 1225, 1113, 1013, 835, 777.

$^1\text{H}$  NMR (400 MHz,  $\text{CDCl}_3$ )  $\delta$  7.55 (d,  $J$  = 8.4 Hz, 2H, ArH), 7.33 (d,  $J$  = 8.8 Hz, 2H, ArH), 5.74 (d,  $J$  = 4.4 Hz, 1H, CH), 5.30 (s, 1H, CH), 3.88 (s, 3H,  $\text{CH}_3$ ), 3.79 (s, 3H,  $\text{CH}_3$ ), 3.78 (d,  $J$  = 4.0 Hz, 1H, CH), 1.57 (s, 9H,  $\text{CH}_3$ ).

$^{13}\text{C}$  NMR (100 MHz,  $\text{CDCl}_3$ )  $\delta$  174.8, 171.8, 168.3, 167.6, 152.4, 135.4, 131.5, 128.6, 126.5, 94.8, 74.2, 59.5, 57.3, 53.9, 53.0, 43.4, 27.9.

HRMS (APCI):  $m/z$  calcd for:  $\text{C}_{21}\text{H}_{22}\text{ClNO}_7$ , 436.1163  $[\text{M}+\text{H}]^+$ ; found: 436.1155.

**Dimethyl 2-(*tert*-butyl)-1,3-dioxo-6-phenyl-1,2,3,3a,4,7a-hexahydropyrano[3,4-*c*]pyrrole-3a,4-dicarboxylate (4b)**

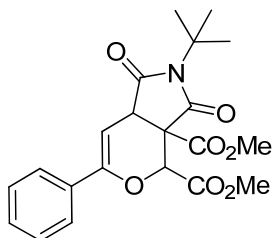

White solid, mp: 103-104 °C.

IR (KBr,  $\nu$ ,  $\text{cm}^{-1}$ ): 2984, 2955, 1784, 1749, 1705, 1496, 1425, 1354, 1335, 1249, 1221, 1163, 1107, 1012, 877, 763, 690.

$^1\text{H}$  NMR (400 MHz,  $\text{CDCl}_3$ )  $\delta$  7.63–7.60 (m, 2H, ArH), 7.37–7.34 (m, 3H, ArH), 5.75 (d,  $J$  = 4.4 Hz, 1H, CH), 5.27 (s, 1H, CH), 3.87 (s, 3H,  $\text{CH}_3$ ), 3.81 (s, 3H,  $\text{CH}_3$ ), 3.78 (d,  $J$  = 4.0 Hz, 1H, CH), 1.57 (s, 9H,  $\text{CH}_3$ ).

$^{13}\text{C}$  NMR (100 MHz,  $\text{CDCl}_3$ )  $\delta$  175.0, 171.9, 168.4, 167.7, 153.5, 133.1, 129.5, 128.4, 125.2, 94.3, 74.2, 59.4, 57.5, 53.9, 52.9, 43.7, 27.9.

HRMS (APCI):  $m/z$  calcd for:  $\text{C}_{21}\text{H}_{23}\text{NO}_7$ , 402.1553  $[\text{M}+\text{H}]^+$ ; found: 402.1559.

**Dimethyl 2-(*tert*-butyl)-6-(4-methoxyphenyl)-1,3-dioxo-1,2,3,3a,4,7a-hexahydropyrano[3,4-*c*]pyrrole-3a,4-dicarboxylate (4c)**

White solid, mp: 155-156 °C.

IR (KBr,  $\nu$ ,  $\text{cm}^{-1}$ ): 3008, 2985, 2880, 2847, 1774, 1696, 1610, 1516, 840, 765, 678.

$^1\text{H}$  NMR (400 MHz,  $\text{CDCl}_3$ )  $\delta$  7.55 (d,  $J$  = 8.8 Hz, 2H, ArH), 6.87 (d,  $J$  = 8.8 Hz, 2H, ArH), 5.60 (d,  $J$  = 8.8 Hz, 1H, CH), 5.25 (s, 1H, CH), 3.87 (s, 3H,  $\text{CH}_3$ ), 3.82 (s, 3H,  $\text{CH}_3$ ), 3.81 (s, 3H,  $\text{CH}_3$ ), 3.75 (d,  $J$  = 4.4 Hz, 1H, CH), 1.57 (s, 9H,  $\text{CH}_3$ ).

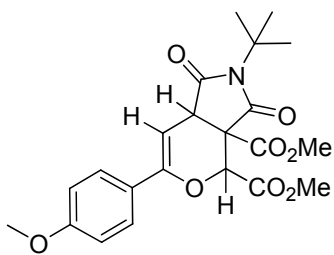

$^{13}\text{C}$  NMR (100 MHz,  $\text{CDCl}_3$ )  $\delta$  175.3, 172.0, 168.5, 167.8, 160.6, 153.4, 126.7, 125.7, 113.7, 92.4, 74.2, 59.3, 57.6, 55.3, 53.8, 52.9, 43.7, 28.0.

HRMS (APCI):  $m/z$  calcd for:  $\text{C}_{22}\text{H}_{25}\text{NO}_8$ , 432.1658 $[\text{M}+\text{H}]^+$ ; found: 432.1656.

**Dimethyl 2-(*tert*-butyl)-1,3-dioxo-6-(*p*-tolyl)-1,2,3,3a,4,7a-hexahydropyrano[3,4-*c*]pyrrole-3a,4-dicarboxylate (4d)**

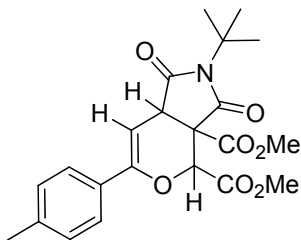

White solid, mp: 139-140 °C.

IR (KBr,  $\nu$ ,  $\text{cm}^{-1}$ ): 2984, 2957, 1778, 1738, 1705, 1259, 1110, 1052, 860, 827, 798, 765.

$^1\text{H}$  NMR (400 MHz,  $\text{CDCl}_3$ )  $\delta$  7.50 (d,  $J = 8.4$  Hz, 2H, ArH), 7.16 (d,  $J = 8.0$  Hz, 2H, ArH), 5.68 (d,  $J = 4.0$  Hz, 1H, CH), 5.25 (s, 1H, CH), 3.87 (s, 3H,  $\text{CH}_3$ ), 3.81 (s, 3H,  $\text{CH}_3$ ), 3.75 (d,  $J = 4.4$  Hz, 1H, CH), 2.35 (s, 3H,  $\text{CH}_3$ ), 1.56 (s, 9H,  $\text{CH}_3$ ).

$^{13}\text{C}$  NMR (100 MHz,  $\text{CDCl}_3$ )  $\delta$  175.2, 172.0, 168.5, 167.8, 153.6, 139.6, 130.3, 129.1, 125.2, 93.4, 74.1, 59.3, 57.6, 53.8, 52.9, 43.7, 28.0, 21.3.

HRMS (APCI):  $m/z$  calcd for:  $\text{C}_{22}\text{H}_{25}\text{NO}_7$ , 416.1709 $[\text{M}+\text{H}]^+$ ; found: 416.1709.

**Diethyl 2-(*tert*-butyl)-6-(4-chlorophenyl)-1,3-dioxo-1,2,3,3a,4,7a-hexahydropyrano[3,4-*c*]pyrrole-3a,4-dicarboxylate (4e)**

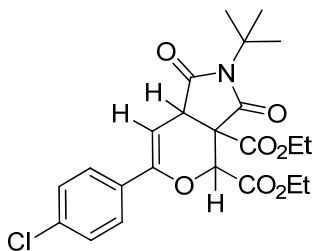

White solid, mp: 88-89 °C.

IR (KBr,  $\nu$ ,  $\text{cm}^{-1}$ ): 2982, 2941, 1744, 1706, 1491, 1402, 1371, 1333, 1246, 1218, 1161, 1025, 835, 774.

$^1\text{H}$  NMR (400 MHz,  $\text{CDCl}_3$ )  $\delta$  7.57 (d,  $J = 8.8$  Hz, 2H, ArH), 7.32 (d,  $J = 8.8$  Hz, 2H, ArH), 5.75 (d,  $J = 4.0$  Hz, 1H, CH), 5.30 (s, 1H, CH), 4.34-4.29 (m, 2H,  $\text{CH}_2$ ), 4.27-4.21 (m, 2H,  $\text{CH}_2$ ), 3.77 (d,  $J = 4.4$  Hz, 1H, CH), 1.57 (s, 9H,  $\text{CH}_3$ ), 1.33 (t,  $J = 6.8$  Hz, 3H,  $\text{CH}_3$ ), 1.22 (t,  $J = 7.2$  Hz, 3H,  $\text{CH}_3$ ).

$^{13}\text{C}$  NMR (100 MHz,  $\text{CDCl}_3$ )  $\delta$  175.0, 171.8, 167.9, 167.0, 152.4, 135.3, 131.7, 128.5, 126.6, 94.9, 74.3, 63.1, 62.2, 59.3, 57.3, 43.4, 27.9, 13.9, 13.9.

HRMS (APCI):  $m/z$  calcd for:  $\text{C}_{23}\text{H}_{26}\text{ClNO}_7$ , 464.1476 $[\text{M}+\text{H}]^+$ ; found: 464.1469.

**Diethyl 2-(*tert*-butyl)-1,3-dioxo-6-phenyl-1,2,3,3a,4,7a-hexahydropyrano[3,4-*c*]pyrrole-3a,4-dicarboxylate (4f)**

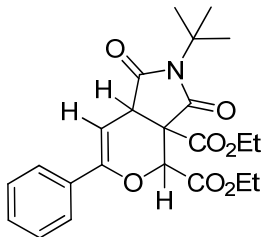

White solid, mp: 81-82 °C.

IR (KBr,  $\nu$ ,  $\text{cm}^{-1}$ ): 2990, 1767, 1735, 1710, 1345, 1266, 1141, 861, 760, 681.

$^1\text{H}$  NMR (400 MHz,  $\text{CDCl}_3$ )  $\delta$  7.67–7.60 (m, 2H, ArH), 7.38–7.31 (m, 3H, ArH), 5.76 (d,  $J = 4.0$  Hz, 1H, CH), 5.28 (s, 1H, CH), 4.35–4.29 (m, 2H,  $\text{CH}_2$ ), 4.28–4.20 (m, 2H,  $\text{CH}_2$ ), 3.77 (d,  $J = 4.4$  Hz, 1H, CH), 1.57 (s, 9H,  $\text{CH}_3$ ), 1.33 (t,  $J = 6.8$  Hz, 3H,  $\text{CH}_3$ ), 1.24 (t,  $J = 7.2$  Hz, 3H,  $\text{CH}_3$ ).

$^{13}\text{C}$  NMR (100 MHz,  $\text{CDCl}_3$ )  $\delta$  175.2, 172.0, 168.0, 167.2, 153.4, 133.2, 129.4, 128.3, 125.3, 94.3, 74.2, 63.1, 62.1, 59.3, 57.4, 43.6, 28.0, 13.9.

HRMS (APCI):  $m/z$  calcd for:  $\text{C}_{23}\text{H}_{27}\text{NO}_7$ , 430.1866 $[\text{M}+\text{H}]^+$ ; found: 430.1860.

**Diethyl 2-(*tert*-butyl)-6-(4-methoxyphenyl)-1,3-dioxo-1,2,3,3a,4,7a-hexahydropyrano[3,4-*c*]pyrrole-3a,4-dicarboxylate (4g)**

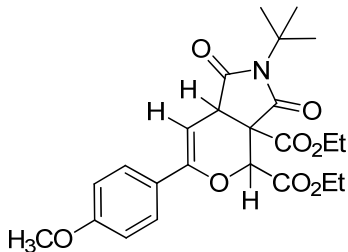

White solid, mp: 110-111 °C.

IR (KBr,  $\nu$ ,  $\text{cm}^{-1}$ ): 2985, 2907, 2879, 1762, 1740, 1712, 1607, 1515, 1341, 1267, 1242, 1183, 1138, 1026, 841, 682, 637.

$^1\text{H}$  NMR (400 MHz,  $\text{CDCl}_3$ )  $\delta$  7.49 (d,  $J = 8.8$  Hz, 2H, ArH), 6.79 (d,  $J = 8.8$  Hz, 2H, ArH), 5.54 (d,  $J = 4.0$  Hz, 1H, CH), 5.18 (s, 1H, CH), 4.25–4.22 (m, 2H,  $\text{CH}_2$ ), 4.20–4.15 (m, 2H,  $\text{CH}_2$ ), 3.74 (s, 3H,  $\text{CH}_3$ ), 3.67 (d,  $J = 4.0$  Hz, 1H, CH), 1.50 (s, 9H,  $\text{CH}_3$ ), 1.25 (t,  $J = 7.2$  Hz, 3H,  $\text{CH}_3$ ), 1.16 (t,  $J = 6.8$  Hz, 3H,  $\text{CH}_3$ ).

$^{13}\text{C}$  NMR (100 MHz,  $\text{CDCl}_3$ )  $\delta$  175.4, 172.1, 168.1, 167.3, 160.6, 153.3, 130.5, 126.8, 113.6, 92.5, 74.2, 63.0, 62.0, 59.2, 57.5, 55.3, 43.6, 27.9, 13.9, 13.9.

HRMS (APCI):  $m/z$  calcd for:  $\text{C}_{24}\text{H}_{29}\text{NO}_8$ , 460.1971 $[\text{M}+\text{H}]^+$ ; found: 460.1976.

**Dimethyl 6-(4-chlorophenyl)-1,3-dioxo-2-(2,4,4-trimethylpentan-2-yl)-1,2,3,3a,4,7a-hexahydropyrano[3,4-*c*]pyrrole-3a,4-dicarboxylate (4h)**

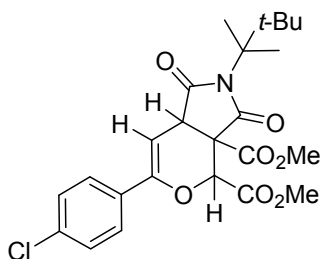

White solid, mp: 138-139 °C.

IR (KBr,  $\nu$ ,  $\text{cm}^{-1}$ ): 2956, 1763, 1748, 1707, 1491, 1435, 1344, 1257, 1128, 1012, 857, 813, 680.

$^1\text{H}$  NMR (400 MHz,  $\text{CDCl}_3$ )  $\delta$  7.53 (d,  $J = 8.8$  Hz, 2H, ArH), 7.32 (d,  $J = 8.8$  Hz, 2H, ArH), 5.68 (d,  $J = 4.4$  Hz, 1H, CH), 5.18 (s, 1H, CH), 3.86 (s, 3H), 3.84 (s, 3H), 3.73 (d,  $J = 4.4$  Hz, 1H, CH), 2.02–1.80 (m, 2H,  $\text{CH}_2$ ), 1.67 (s, 3H,  $\text{CH}_3$ ), 1.63 (s, 3H,  $\text{CH}_3$ ), 0.89 (s, 9H,  $\text{CH}_3$ ).

$^{13}\text{C}$  NMR (100 MHz,  $\text{CDCl}_3$ )  $\delta$  175.0, 172.3, 168.4, 167.5, 152.7, 135.4, 131.5, 128.6, 126.5, 94.6, 74.1, 63.6, 57.7, 53.7, 53.0, 50.1, 44.0, 31.5, 31.0, 29.0, 29.0.

HRMS (APCI):  $m/z$  calcd for:  $\text{C}_{25}\text{H}_{30}\text{ClNO}_7$ , 492.1789 $[\text{M}+\text{H}]^+$ ; found: 492.1791.

**Dimethyl 1,3-dioxo-6-phenyl-2-(2,4,4-trimethylpentan-2-yl)-1,2,3,3a,4,7a-hexahydropyrano[3,4-c]pyrrole-3a,4-dicarboxylate (4i)**

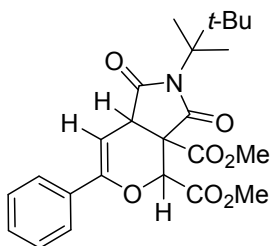

White solid, mp: 98-99 °C.

IR (KBr,  $\nu$ ,  $\text{cm}^{-1}$ ): 2955, 1761, 1740, 1709, 1433, 1345, 1258, 1227, 1126, 861, 777, 758, 689.

$^1\text{H}$  NMR (400 MHz,  $\text{CDCl}_3$ )  $\delta$  7.61–7.57 (m, 2H, ArH), 7.37–7.33 (m, 3H, ArH), 5.69 (d,  $J = 4.4$  Hz, 1H, CH), 5.17 (s, 1H, CH), 3.86 (s, 3H,  $\text{CH}_3$ ), 3.85 (s, 3H,  $\text{CH}_3$ ), 3.73 (d,  $J = 4.4$  Hz, 1H, CH), 2.03–1.80 (m, 2H,  $\text{CH}_2$ ), 1.67 (s, 3H,  $\text{CH}_3$ ), 1.63 (s, 3H,  $\text{CH}_3$ ), 0.89 (s, 9H,  $\text{CH}_3$ ).

$^{13}\text{C}$  NMR (100 MHz,  $\text{CDCl}_3$ )  $\delta$  175.2, 172.4, 168.5, 167.7, 153.8, 133.1, 129.5, 128.4, 125.2, 94.1, 74.1, 63.5, 57.9, 53.7, 52.9, 50.1, 44.2, 31.5, 31.0, 29.0, 29.0.

HRMS (APCI):  $m/z$  calcd for:  $\text{C}_{25}\text{H}_{31}\text{NO}_7$ , 458.2179 $[\text{M}+\text{H}]^+$ ; found: 458.2180.

**Dimethyl 6-(4-methoxyphenyl)-1,3-dioxo-2-(2,4,4-trimethylpentan-2-yl)-1,2,3,3a,4,7a-hexahydropyrano[3,4-c]pyrrole-3a,4-dicarboxylate (4j)**

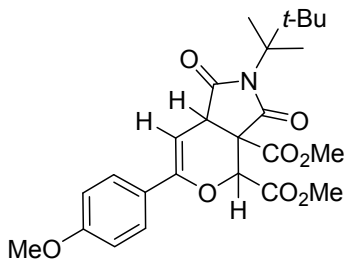

White solid, mp: 117-118 °C.

IR (KBr,  $\nu$ ,  $\text{cm}^{-1}$ ): 2955, 1759, 1747, 1708, 1608, 1512, 1345, 1242, 1175, 1127, 842, 684.

$^1\text{H}$  NMR (400 MHz,  $\text{CDCl}_3$ )  $\delta$  7.52 (d,  $J = 8.8$  Hz, 2H, ArH), 6.87 (d,  $J = 8.8$  Hz, 2H, ArH), 5.55

(d,  $J = 4.0$  Hz, 1H, CH), 5.15 (s, 1H, CH), 3.85 (s, 3H, CH<sub>3</sub>), 3.84 (s, 3H, CH<sub>3</sub>), 3.82 (s, 3H, CH<sub>3</sub>), 3.70 (d,  $J = 4.0$  Hz, 1H, CH), 2.02–1.80 (m, 2H, CH<sub>2</sub>), 1.67 (s, 3H, CH<sub>3</sub>), 1.62 (s, 3H, CH<sub>3</sub>), 0.89 (s, 9H, CH<sub>3</sub>).

<sup>13</sup>C NMR (100 MHz, CDCl<sub>3</sub>)  $\delta$  175.4, 172.5, 168.6, 167.8, 160.6, 153.7, 126.7, 125.7, 113.7, 92.3, 74.1, 63.5, 58.0, 55.3, 53.6, 52.9, 50.1, 44.2, 31.5, 31.0, 29.1, 29.0.

HRMS (APCI):  $m/z$  calcd for: C<sub>26</sub>H<sub>33</sub>NO<sub>8</sub>, 488.2284[M+H]<sup>+</sup>; found: 488.2274.

**Diethyl 6-(4-chlorophenyl)-1,3-dioxo-2-(2,4,4-trimethylpentan-2-yl)-1,2,3,3a,4,7a-hexahydropyrano[3,4-c]pyrrole-3a,4-dicarboxylate (4k)**

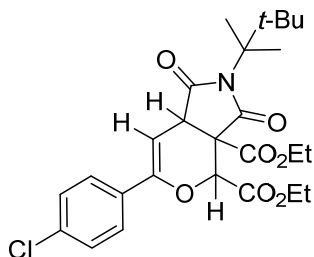

White solid, mp: 124-125 °C.

IR (KBr,  $\nu$ , cm<sup>-1</sup>): 2952, 1748, 1731, 1704, 1300, 1261, 1220, 1106, 1019, 860, 844, 763.

<sup>1</sup>H NMR (400 MHz, CDCl<sub>3</sub>)  $\delta$  7.47 (d,  $J = 8.8$  Hz, 2H, ArH), 7.25 (d,  $J = 8.8$  Hz, 2H, ArH), 5.63 (d,  $J = 4.4$  Hz, 1H, CH), 5.15 (s, 1H, CH), 4.25–4.22 (m, 2H, CH<sub>2</sub>), 4.21–4.15 (m, 2H, CH<sub>2</sub>), 3.65 (d,  $J = 4.4$  Hz, 1H, CH), 1.98–1.71 (m, 2H, CH<sub>2</sub>), 1.61 (s, 3H, CH<sub>3</sub>), 1.56 (s, 3H, CH<sub>3</sub>), 1.25 (t,  $J = 7.2$  Hz, 3H, CH<sub>3</sub>), 1.17 (t,  $J = 7.2$  Hz, 3H, CH<sub>3</sub>), 0.83 (s, 9H, CH<sub>3</sub>).

<sup>13</sup>C NMR (100 MHz, CDCl<sub>3</sub>)  $\delta$  175.2, 172.3, 167.9, 166.9, 152.6, 135.3, 131.7, 128.5, 126.5, 94.6, 74.2, 63.5, 63.1, 62.1, 57.5, 50.1, 43.8, 31.5, 31.0, 29.0, 28.9, 14.0, 13.9.

HRMS (APCI):  $m/z$  calcd for: C<sub>27</sub>H<sub>34</sub>ClNO<sub>7</sub>, 520.2102[M+H]<sup>+</sup>; found: 520.2098.

**Diethyl 1,3-dioxo-6-phenyl-2-(2,4,4-trimethylpentan-2-yl)-1,2,3,3a,4,7a-hexahydropyrano[3,4-c]pyrrole-3a,4-dicarboxylate (4l)**

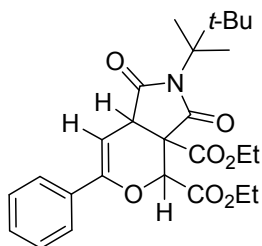

White solid, mp: 110-111 °C.

IR (KBr,  $\nu$ , cm<sup>-1</sup>): 2980, 2952, 1741, 1698, 1339, 1251, 1221, 1098, 1023, 858, 757, 688.

<sup>1</sup>H NMR (400 MHz, CDCl<sub>3</sub>)  $\delta$  7.56–7.51 (m, 2H, ArH), 7.30–7.25 (m, 3H, ArH), 5.63 (d,  $J = 4.4$  Hz, 1H, CH), 5.14 (s, 1H, CH), 4.25–4.22 (m, 2H, CH<sub>2</sub>), 4.22–4.15 (m, 2H, CH<sub>2</sub>), 3.66 (d,  $J = 4.4$  Hz, 1H, CH), 1.98–1.72 (m, 2H, CH<sub>2</sub>), 1.61 (s, 3H, CH<sub>3</sub>), 1.56 (s, 3H, CH<sub>3</sub>), 1.25 (t,  $J = 7.2$  Hz, 3H, CH<sub>3</sub>), 1.18 (t,  $J = 7.2$  Hz, 3H, CH<sub>3</sub>), 0.83 (s, 9H, CH<sub>3</sub>).

<sup>13</sup>C NMR (100 MHz, CDCl<sub>3</sub>)  $\delta$  175.4, 172.4, 168.0, 167.1, 153.7, 133.2, 129.4, 128.3, 125.2, 94.1, 74.2, 63.4, 63.0, 62.0, 57.7, 50.1, 43.9, 31.5, 31.0, 29.0, 28.9, 14.0, 13.9.

HRMS (APCI):  $m/z$  calcd for: C<sub>27</sub>H<sub>35</sub>NO<sub>7</sub>, 486.2492[M+H]<sup>+</sup>; found: 486.2495.

**Diethyl 6-(4-methoxyphenyl)-1,3-dioxo-2-(2,4,4-trimethylpentan-2-yl)-1,2,3,3a,4,7a-**



### hexahydropyrano[3,4-c]pyrrole-3a,4-dicarboxylate (4m)

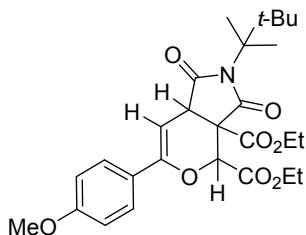

White solid, mp: 108-109 °C.

IR (KBr,  $\nu$ ,  $\text{cm}^{-1}$ ): 2979, 2953, 1767, 1744, 1707, 1512, 1248, 1176, 1127, 1031, 852, 805, 682, 603.

$^1\text{H}$  NMR (400 MHz, DMSO)  $\delta$  7.55 – 7.50 (m, 2H, ArH), 6.97 – 6.93 (m, 2H, ArH), 5.62 (d,  $J$  = 4.4 Hz, 1H, CH), 5.15 (s, 1H, CH), 4.24 – 4.14 (m, 4H, CH<sub>2</sub>), 3.81 (d,  $J$  = 4.4 Hz, 1H, CH), 3.77 (s, 3H, CH<sub>3</sub>), 1.93 – 1.76 (m, 2H, CH<sub>2</sub>), 1.59 (s, 3H, CH<sub>3</sub>), 1.54 (s, 3H, CH<sub>3</sub>), 1.22 (t,  $J$  = 7.2 Hz, 3H, CH<sub>3</sub>), 1.17 (t,  $J$  = 7.2 Hz, 3H, CH<sub>3</sub>), 0.82 (s, 9H, CH<sub>3</sub>).

$^{13}\text{C}$  NMR (100 MHz, DMSO)  $\delta$  174.8, 172.5, 167.5, 166.5, 160.0, 152.5, 126.3, 125.4, 113.6, 92.4, 73.3, 62.4, 62.1, 61.2, 57.3, 55.1, 49.3, 43.4, 31.0, 30.6, 28.7, 28.5, 13.6, 13.5.

HRMS (APCI):  $m/z$  calcd for: C<sub>28</sub>H<sub>37</sub>NO<sub>8</sub>, 516.2597[M+H]<sup>+</sup>; found: 516.2598.

### Dimethyl 2-(adamantan-1-yl)-6-(4-chlorophenyl)-1,3-dioxo-1,2,3,3a,4,7a-hexahydropyrano[3,4-c]pyrrole-3a,4-dicarboxylate (4n)

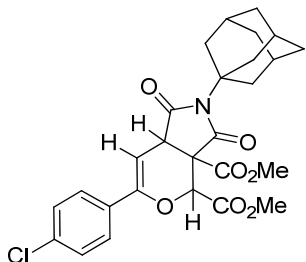

White solid, mp: 150-151 °C.

IR (KBr,  $\nu$ ,  $\text{cm}^{-1}$ ): 2910, 2849, 1741, 1705, 1491, 1304, 1156, 1112, 1013, 837, 773, 643.

$^1\text{H}$  NMR (400 MHz, CDCl<sub>3</sub>)  $\delta$  7.55 (d,  $J$  = 8.8 Hz, 2H, ArH), 7.33 (d,  $J$  = 8.8 Hz, 2H, ArH), 5.72 (d,  $J$  = 4.4 Hz, 1H, CH), 5.23 (s, 1H, CH), 3.87 (s, 3H, CH<sub>3</sub>), 3.81 (s, 3H, CH<sub>3</sub>), 3.73 (d,  $J$  = 4.4 Hz, 1H, CH), 2.38 (d,  $J$  = 2.4 Hz, 6H), 2.11 (s, 3H), 1.76–1.62 (m, 6H).

$^{13}\text{C}$  NMR (100 MHz, CDCl<sub>3</sub>)  $\delta$  174.9, 172.0, 168.4, 167.6, 152.4, 135.4, 131.6, 128.6, 126.5, 94.8, 74.1, 62.2, 57.4, 53.9, 53.0, 43.7, 38.9, 36.1, 29.7.

HRMS (APCI):  $m/z$  calcd for: C<sub>27</sub>H<sub>28</sub>ClNO<sub>7</sub>, 514.1633[M+H]<sup>+</sup>; found: 516.1634.

### Dimethyl 2-(adamantan-1-yl)-1,3-dioxo-6-phenyl-1,2,3,3a,4,7a-hexahydropyrano[3,4-c]pyrrole-3a,4-dicarboxylate (4o)

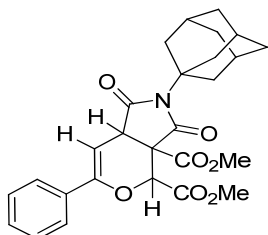

White solid, mp: 107-108 °C.

IR (KBr,  $\nu$ ,  $\text{cm}^{-1}$ ): 2951, 2901, 2844, 1740, 1708, 1447, 1304, 1232, 1113, 1050, 864, 756, 691.

$^1\text{H}$  NMR (400 MHz,  $\text{CDCl}_3$ )  $\delta$  7.67–7.57 (m, 2H, ArH), 7.41–7.31 (m, 3H, ArH), 5.72 (d,  $J = 4.4$  Hz, 1H, CH), 5.20 (s, 1H, CH), 3.87 (s, 3H,  $\text{CH}_3$ ), 3.83 (s, 3H,  $\text{CH}_3$ ), 3.73 (d,  $J = 4.4$  Hz, 1H, CH), 2.38 (d,  $J = 2.4$  Hz, 6H), 2.10 (s, 3H), 1.74–1.63 (m, 6H).

$^{13}\text{C}$  NMR (100 MHz,  $\text{CDCl}_3$ )  $\delta$  175.1, 172.2, 168.5, 167.8, 153.5, 133.1, 129.5, 128.4, 125.2, 94.3, 74.1, 62.1, 57.5, 53.8, 52.9, 43.9, 38.9, 36.1, 29.7.

HRMS (APCI):  $m/z$  calcd for:  $\text{C}_{27}\text{H}_{29}\text{NO}_7$ , 480.2022[M+H] $^+$ ; found: 480.2019.

**Dimethyl 2-(adamantan-1-yl)-6-(4-methoxyphenyl)-1,3-dioxo-1,2,3,3a,4,7a-hexahydro pyrano[3,4-c]pyrrole-3a,4-dicarboxylate (4p)**

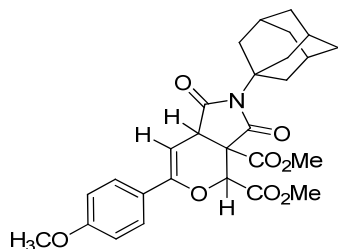

White solid, mp: 161-162 °C.

IR (KBr,  $\nu$ ,  $\text{cm}^{-1}$ ): 2903, 2844, 1743, 1699, 1608, 1514, 1335, 1303, 1257, 1183, 1154, 1103, 847, 794, 769, 661.

$^1\text{H}$  NMR (400 MHz,  $\text{CDCl}_3$ )  $\delta$  7.55 (d,  $J = 8.8$  Hz, 2H, ArH), 6.87 (d,  $J = 8.8$  Hz, 2H, ArH), 5.58 (d,  $J = 4.0$  Hz, 1H, CH), 5.18 (s, 1H, CH), 3.86 (s, 3H,  $\text{CH}_3$ ), 3.83–3.80 (m, 6H), 3.70 (d,  $J = 4.0$  Hz, 1H, CH), 2.38 (d,  $J = 2.8$  Hz, 6H), 2.10 (s, 3H), 1.73–1.64 (m, 6H).

$^{13}\text{C}$  NMR (100 MHz,  $\text{CDCl}_3$ )  $\delta$  175.4, 172.3, 168.6, 167.9, 160.6, 153.4, 130.5, 126.7, 113.7, 92.5, 74.1, 62.0, 57.6, 55.3, 53.8, 52.9, 43.9, 38.9, 36.1, 29.7.

HRMS (APCI):  $m/z$  calcd for:  $\text{C}_{28}\text{H}_{31}\text{NO}_8$ , 510.2128[M+H] $^+$ ; found: 510.2130.

**Dimethyl 2-benzyl-6-(4-chlorophenyl)-1,3-dioxo-1,2,3,3a,4,7a-hexahydro pyrano[3,4-c] pyrrole-3a,4-dicarboxylate (4q)**

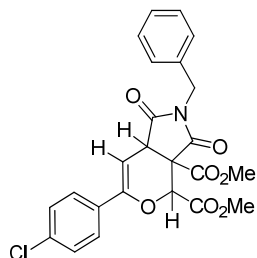

White solid, mp: 131-132 °C.

IR (KBr,  $\nu$ ,  $\text{cm}^{-1}$ ): 2963, 2873, 1740, 1706, 1492, 1398, 1259, 1092, 1001, 838, 772, 744, 701, 630.

$^1\text{H}$  NMR (400 MHz,  $\text{CDCl}_3$ )  $\delta$  7.57–7.49 (m, 2H, ArH), 7.34–7.25 (m, 7H, ArH), 5.74 (d,  $J = 4.4$  Hz, 1H, CH), 5.31 (s, 1H, CH), 4.75–4.62 (m, 2H,  $\text{CH}_2$ ), 3.92 (d,  $J = 4.0$  Hz, 1H, CH), 3.80 (s, 3H,  $\text{CH}_3$ ), 3.72 (s, 3H,  $\text{CH}_3$ ).

$^{13}\text{C}$  NMR (100 MHz,  $\text{CDCl}_3$ )  $\delta$  173.4, 170.8, 167.8, 167.2, 153.0, 135.6, 134.8, 131.3, 128.6, 128.6, 128.4, 128.0, 126.6, 94.3, 74.4, 57.8, 54.0, 53.0, 43.8, 43.2.

HRMS (APCI):  $m/z$  calcd for:  $\text{C}_{24}\text{H}_{20}\text{ClNO}_7$ , 470.1007[M+H] $^+$ ; found: 470.1007.

**Dimethyl 2-benzyl-1,3-dioxo-6-phenyl-1,2,3,3a,4,7a-hexahydropyrano[3,4-c]pyrrole-3a,4-dicarboxylate (4r)**

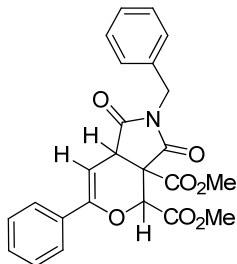

White solid, mp: 126-127 °C.

IR (KBr,  $\nu$ ,  $\text{cm}^{-1}$ ): 2955, 1785, 1745, 1716, 1438, 1335, 1273, 1126, 1020, 804, 761, 723, 696.

$^1\text{H}$  NMR (400 MHz,  $\text{CDCl}_3$ )  $\delta$  7.57–7.49 (m, 2H, ArH), 7.32–7.26 (m, 3H, ArH), 7.25–7.17 (m, 5H, ArH), 5.68 (d,  $J = 4.0$  Hz, 1H, CH), 5.22 (s, 1H, CH), 4.66–4.56 (m, 2H,  $\text{CH}_2$ ), 3.85 (d,  $J = 4.4$  Hz, 1H, CH), 3.74 (s, 3H,  $\text{CH}_3$ ), 3.68 (s, 3H,  $\text{CH}_3$ ).

$^{13}\text{C}$  NMR (100 MHz,  $\text{CDCl}_3$ )  $\delta$  173.6, 170.9, 167.9, 167.4, 154.1, 134.8, 132.8, 129.6, 128.6, 128.4, 128.3, 127.9, 125.3, 93.9, 74.3, 58.0, 53.9, 53.0, 44.0, 43.1.

HRMS (APCI):  $m/z$  calcd for:  $\text{C}_{24}\text{H}_{21}\text{NO}_7$ , 436.1396 $[\text{M}+\text{H}]^+$ ; found: 436.1398.

**Dimethyl 2-benzyl-6-(4-methoxyphenyl)-1,3-dioxo-1,2,3,3a,4,7a-hexahydropyrano[3,4-c]pyrrole-3a,4-dicarboxylate (4s)**

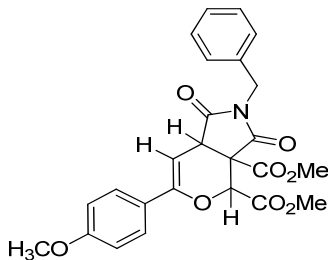

White solid, mp: 127-128 °C.

IR (KBr,  $\nu$ ,  $\text{cm}^{-1}$ ): 2952, 2894, 1747, 1712, 1610, 1514, 1395, 1259, 1174, 1115, 999, 839, 762, 692, 631.

$^1\text{H}$  NMR (400 MHz, DMSO)  $\delta$  7.58 – 7.54 (m, 2H, ArH), 7.28 – 7.23 (m, 3H, ArH), 7.21 – 7.16 (m, 2H, ArH), 6.99 – 6.94 (m, 2H, ArH), 5.75 (d,  $J = 4.8$  Hz, 1H, CH), 5.27 (s, 1H, CH), 4.67 – 4.59 (m, 2H,  $\text{CH}_2$ ), 4.16 (d,  $J = 4.4$  Hz, 1H, CH), 3.78 (s, 3H,  $\text{CH}_3$ ), 3.76 (s, 3H,  $\text{CH}_3$ ), 3.68 (s, 3H,  $\text{CH}_3$ ).

$^{13}\text{C}$  NMR (100 MHz, DMSO)  $\delta$  173.4, 171.1, 167.4, 166.9, 160.1, 153.0, 135.1, 128.4, 127.4, 126.9, 126.4, 125.1, 113.7, 92.7, 73.8, 57.8, 55.1, 53.5, 52.4, 43.6, 41.8.

HRMS (APCI):  $m/z$  calcd for:  $\text{C}_{25}\text{H}_{23}\text{NO}_8$ , 466.1502 $[\text{M}+\text{H}]^+$ ; found: 466.1501.

**diethyl 2-benzyl-6-(4-chlorophenyl)-1,3-dioxo-1,2,3,3a,4,7a-hexahydropyrano[3,4-c]pyrrole-3a,4-dicarboxylate (4t)**

White solid, mp: 132-133 °C.

IR (KBr,  $\nu$ ,  $\text{cm}^{-1}$ ): 2992, 1751, 1734, 1707, 1400, 1303, 1255, 1221, 1091, 1016, 937, 837, 768, 749, 701, 629.

$^1\text{H}$  NMR (400 MHz, DMSO)  $\delta$  7.69 – 7.64 (m, 2H, ArH), 7.51 – 7.46 (m, 2H, ArH), 7.31 – 7.24 (m, 3H, ArH), 7.23 – 7.18 (m, 2H, ArH), 5.99 (d,  $J = 4.4$  Hz, 1H, CH), 5.33 (s, 1H, CH), 4.68 – 4.59 (m, 2H,  $\text{CH}_2$ ), 4.24 – 4.18 (m, 3H), 4.18 – 4.12 (m, 2H,  $\text{CH}_2$ ), 1.21 – 1.12 (m, 6H,  $\text{CH}_3$ ).

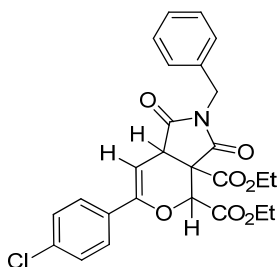

$^{13}\text{C}$  NMR (100 MHz, DMSO)  $\delta$  173.2, 171.0, 166.8, 166.2, 151.8, 135.1, 133.9, 131.6, 128.4, 128.4, 127.5, 127.0, 126.6, 95.6, 73.8, 62.6, 61.4, 57.6, 43.4, 41.9, 13.6, 13.5.

HRMS (APCI):  $m/z$  calcd for:  $\text{C}_{26}\text{H}_{24}\text{ClNO}_7$ , 498.1320 $[\text{M}+\text{H}]^+$ ; found: 498.1321.

**Dimethyl 6-(4-chlorophenyl)-2-cyclohexyl-1,3-dioxo-1,2,3,3a,4,7a-hexahydropyrano[3,4-c]pyrrole-3a,4-dicarboxylate (4u)**

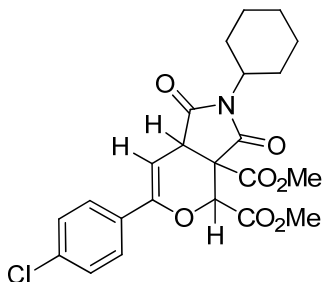

White solid, mp: 130-131 °C.

IR (KBr,  $\nu$ ,  $\text{cm}^{-1}$ ): 2957, 2929, 2853, 1779, 1739, 1701, 1492, 1370, 1261, 1187, 1106, 1046, 1000, 851, 776, 641.

$^1\text{H}$  NMR (400 MHz,  $\text{CDCl}_3$ )  $\delta$  7.51–7.44 (m, 2H, ArH), 7.30–7.22 (m, 2H, ArH), 5.69 (d,  $J = 4.0$  Hz, 1H, CH), 5.24 (s, 1H, CH), 3.92–3.84 (m, 1H, CH), 3.80 (s, 3H,  $\text{CH}_3$ ), 3.76 (d,  $J = 4.4$  Hz, 1H, CH), 3.72 (s, 3H,  $\text{CH}_3$ ), 2.07–1.93 (m, 2H), 1.78–1.54 (m, 5H), 1.27–1.08 (m, 3H).

$^{13}\text{C}$  NMR (100 MHz,  $\text{CDCl}_3$ )  $\delta$  173.9, 171.1, 168.1, 167.4, 152.7, 135.5, 131.4, 128.6, 126.5, 94.7, 74.3, 57.4, 54.0, 53.0, 52.8, 43.4, 28.6, 28.2, 25.7, 25.7, 25.0.

HRMS (APCI):  $m/z$  calcd for:  $\text{C}_{23}\text{H}_{24}\text{ClNO}_7$ , 462.1320 $[\text{M}+\text{H}]^+$ ; found: 462.1329.

**Dimethyl 2-cyclohexyl-1,3-dioxo-6-phenyl-1,2,3,3a,4,7a-hexahydropyrano[3,4-c]pyrrole-3a,4-dicarboxylate (4v)**

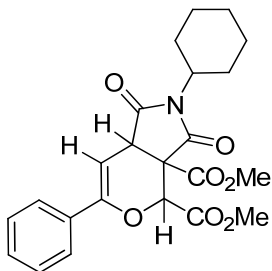

White solid, mp: 94-95 °C.

IR (KBr,  $\nu$ ,  $\text{cm}^{-1}$ ): 2954, 2855, 1742, 1733, 1704, 1368, 1269, 1106, 999, 896, 764, 694.

$^1\text{H}$  NMR (400 MHz,  $\text{CDCl}_3$ )  $\delta$  7.64–7.59 (m, 2H, ArH), 7.37–7.33 (m, 3H, ArH), 5.76 (d,  $J = 4.4$  Hz, 1H, CH), 5.29 (s, 1H, CH), 3.99–3.92 (m, 1H, CH), 3.87 (s, 3H,  $\text{CH}_3$ ), 3.83 (d,  $J = 4.4$  Hz, 1H, CH), 3.81 (s, 3H,  $\text{CH}_3$ ), 2.14–2.02 (m, 2H), 1.83–1.62 (m, 5H), 1.32–1.17 (m, 3H).

$^{13}\text{C}$  NMR (100 MHz,  $\text{CDCl}_3$ )  $\delta$  174.1, 171.2, 168.2, 167.5, 153.7, 133.0, 129.5, 128.4, 125.2, 94.2, 74.3, 57.5, 53.9, 53.0, 52.7, 43.6, 28.7, 28.2, 25.7, 25.7, 25.0.  
HRMS (APCI):  $m/z$  calcd for:  $\text{C}_{23}\text{H}_{25}\text{NO}_7$ , 428.1709 $[\text{M}+\text{H}]^+$ ; found: 428.1704.

**Dimethyl 2-(4-bromophenyl)-6-(4-chlorophenyl)-1,3-dioxo-1,2,3,3a,4,7a-hexahydropyrano [3,4-c]pyrrole-3a,4-dicarboxylate (4w)**

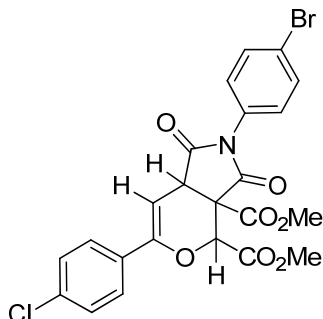

White solid, mp: 175-176 °C.

IR (KBr,  $\nu$ ,  $\text{cm}^{-1}$ ): 2953, 2878, 1741, 1716, 1490, 1381, 1255, 1113, 1094, 1046, 1014, 820, 770, 618.

$^1\text{H}$  NMR (400 MHz,  $\text{CDCl}_3$ )  $\delta$  7.62–7.57 (m, 4H, ArH), 7.37–7.33 (m, 2H, ArH), 7.28 (s, 1H, ArH), 7.25 (s, 1H, ArH), 5.88 (d,  $J = 4.0$  Hz, 1H, CH), 5.61 (s, 1H, CH), 4.18 (d,  $J = 4.0$  Hz, 1H, CH), 3.94 (s, 3H,  $\text{CH}_3$ ), 3.74 (s, 3H,  $\text{CH}_3$ ).

$^{13}\text{C}$  NMR (100 MHz,  $\text{CDCl}_3$ )  $\delta$  172.8, 169.8, 167.7, 167.4, 153.0, 135.7, 132.4, 131.3, 130.5, 128.7, 128.0, 126.7, 122.9, 94.2, 74.8, 57.4, 54.4, 53.3, 42.6.

HRMS (APCI):  $m/z$  calcd for:  $\text{C}_{23}\text{H}_{17}\text{BrClNO}_7$ , 533.9955 $[\text{M}+\text{H}]^+$ ; found: 533.9956.

### Copies of $^1\text{H}$ NMR and $^{13}\text{C}$ NMR of compounds 4

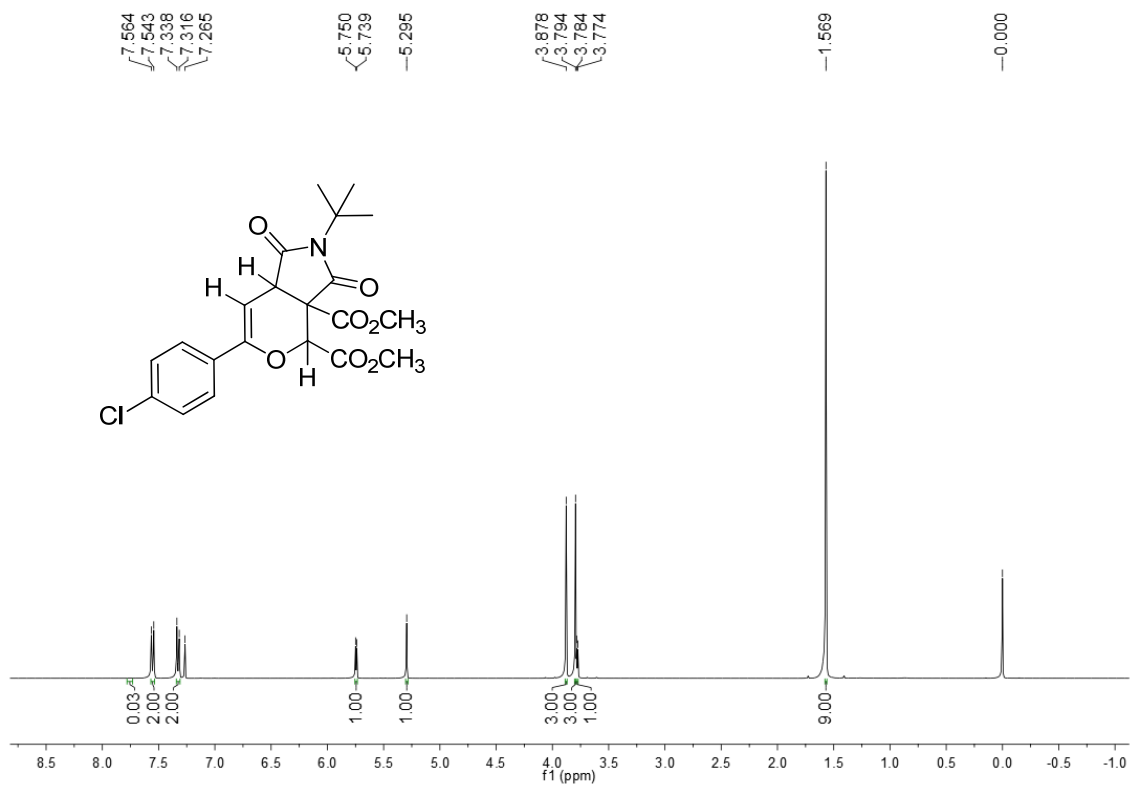

### $^1\text{H}$ NMR Spectrum of Compound 4a

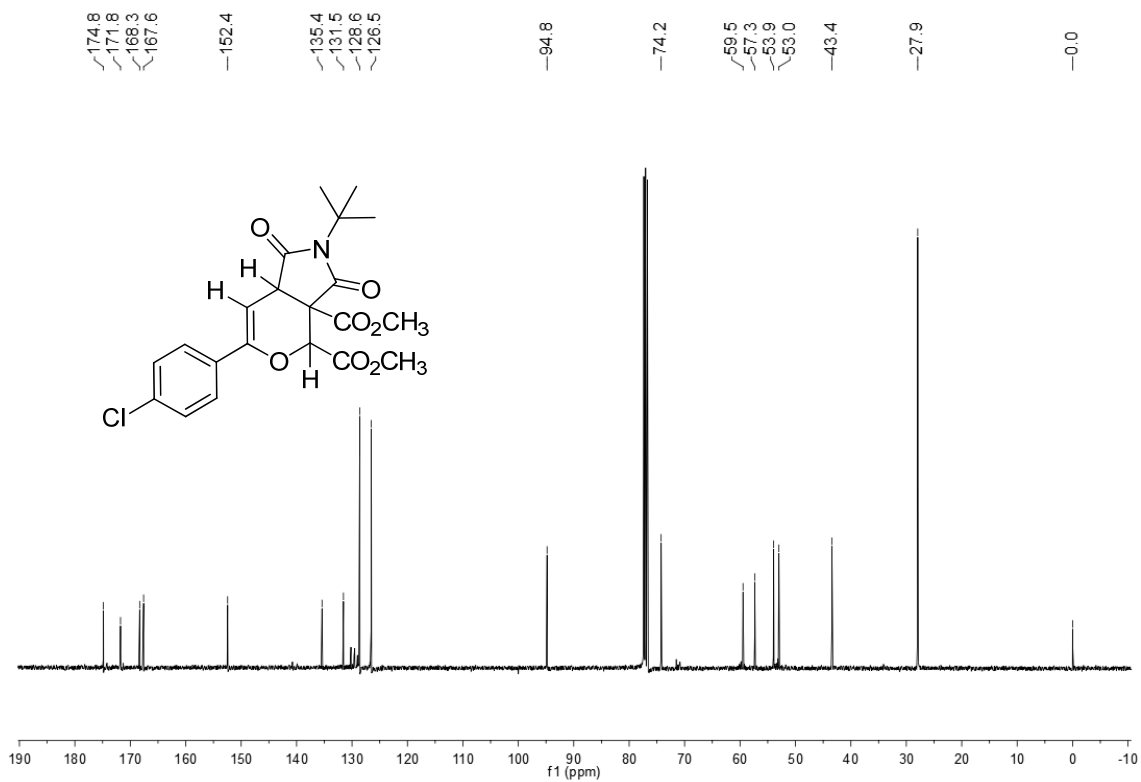

### $^{13}\text{C}$ NMR Spectrum of Compound 4a

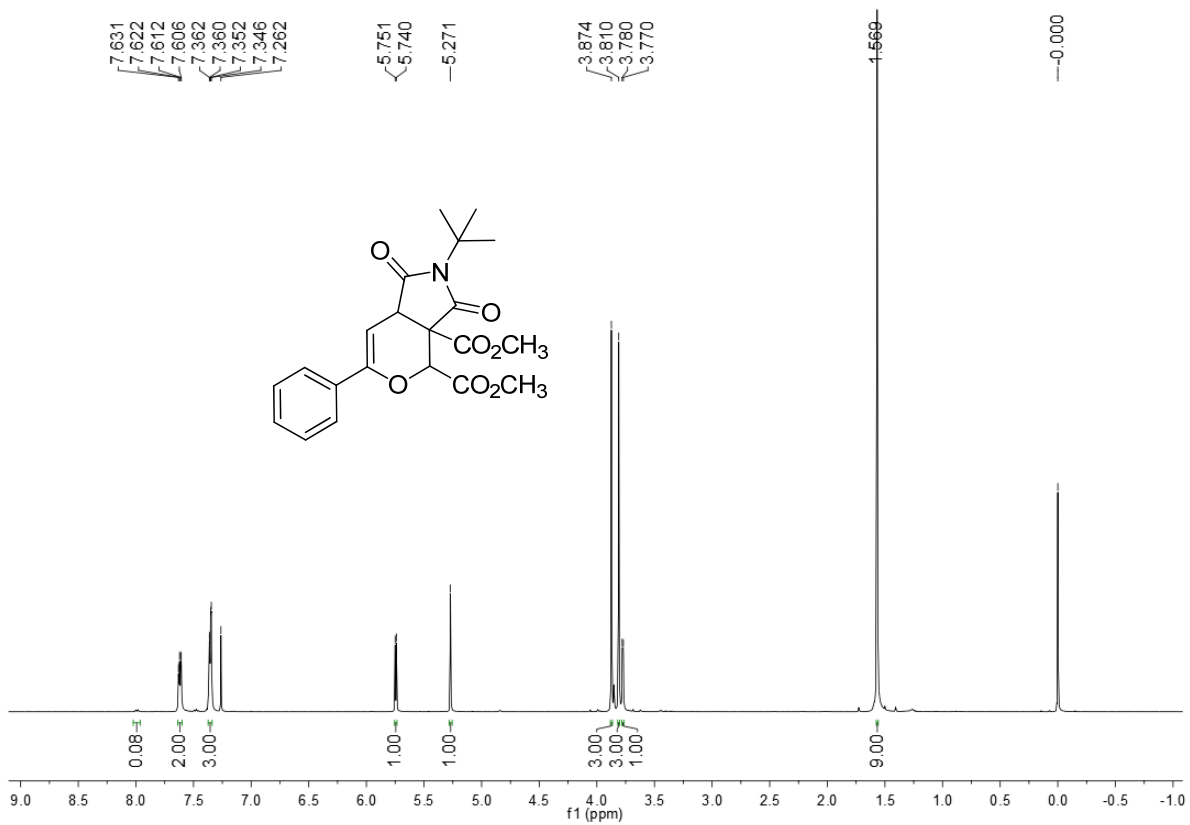

**<sup>1</sup>H NMR Spectrum of Compound 4b**

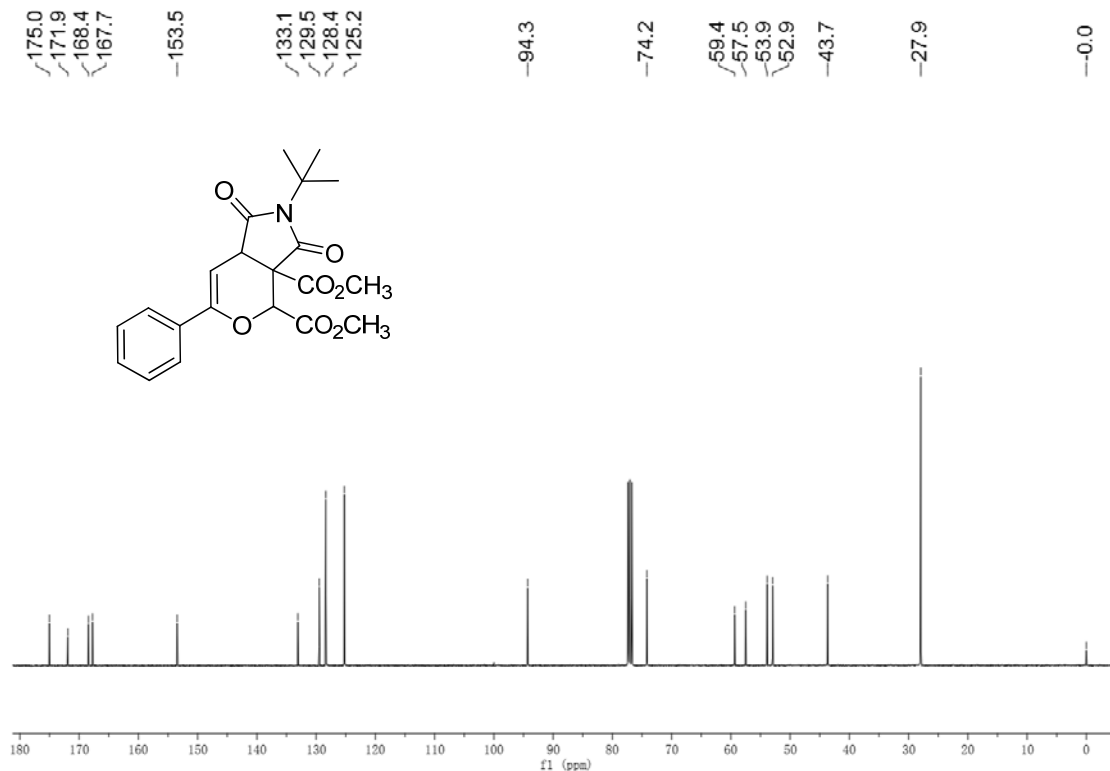

**<sup>13</sup>C NMR Spectrum of Compound 4b**

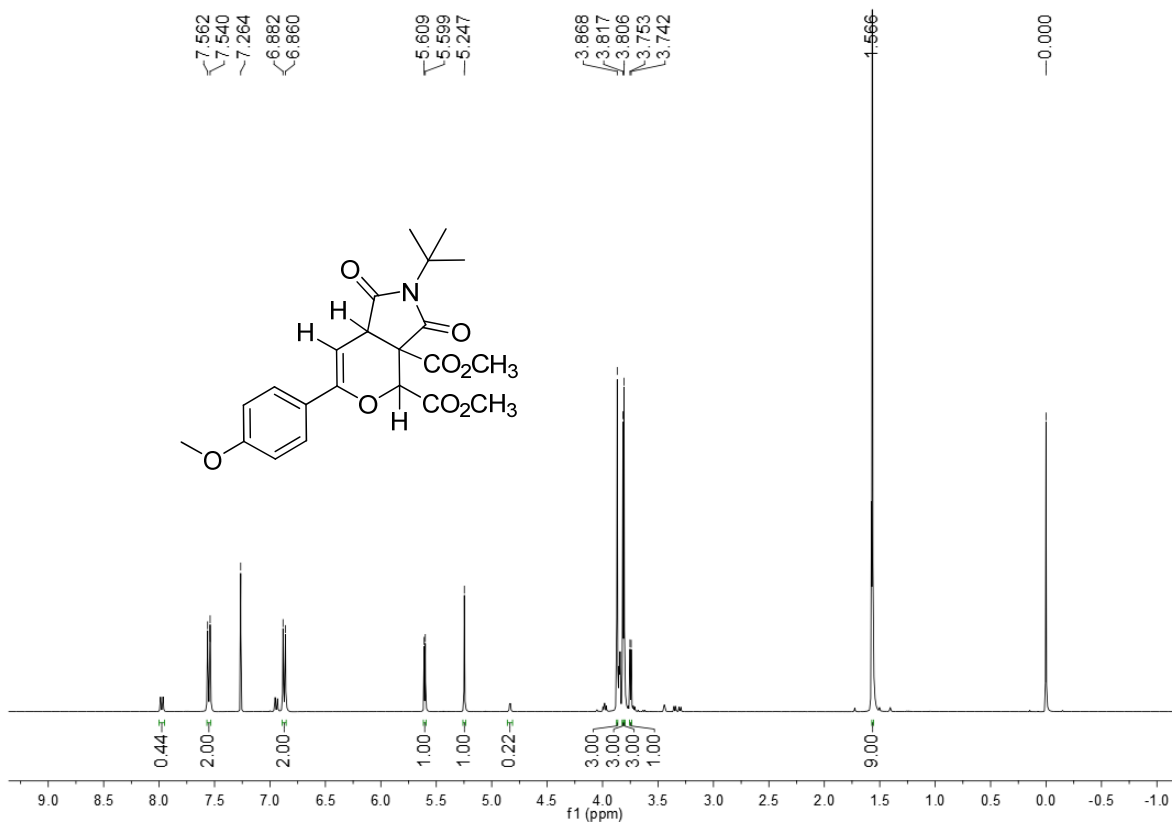

**<sup>1</sup>H NMR Spectrum of Compound 4c**

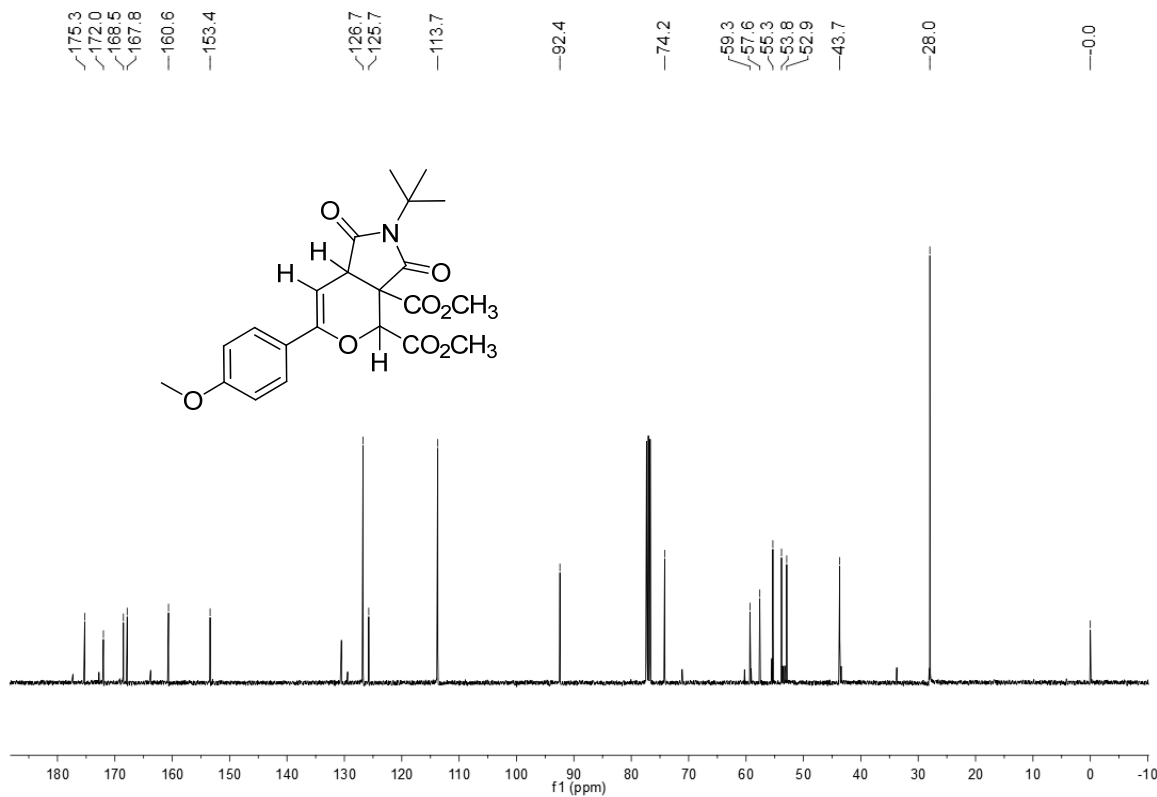

**<sup>13</sup>C NMR Spectrum of Compound 4c**



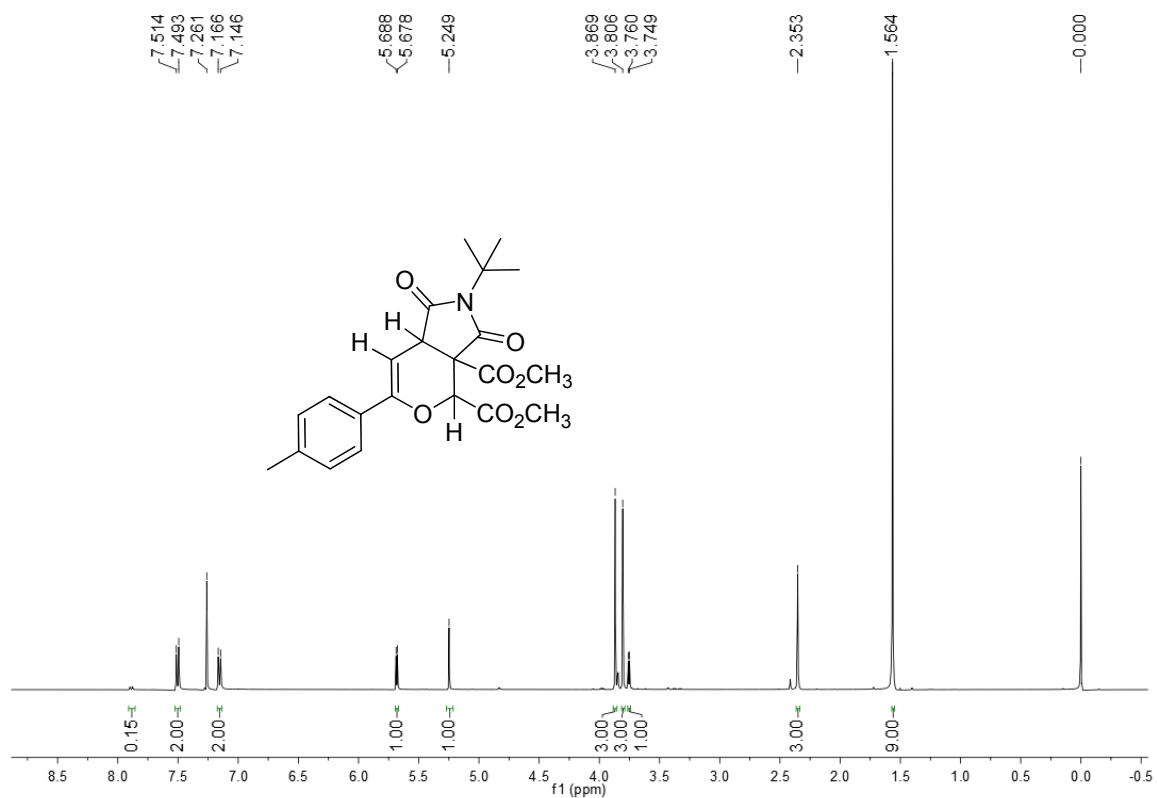

**<sup>1</sup>H NMR Spectrum of Compound 4d**

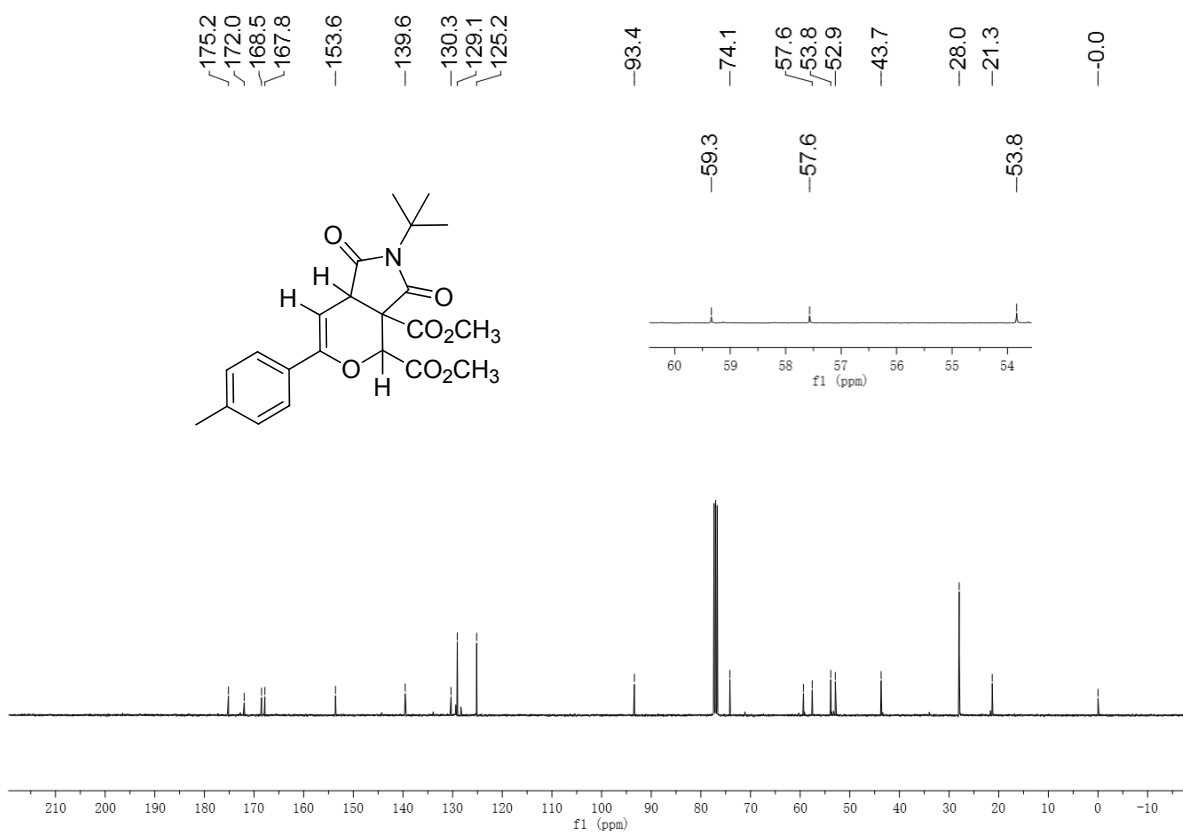

**<sup>13</sup>C NMR Spectrum of Compound 4d**

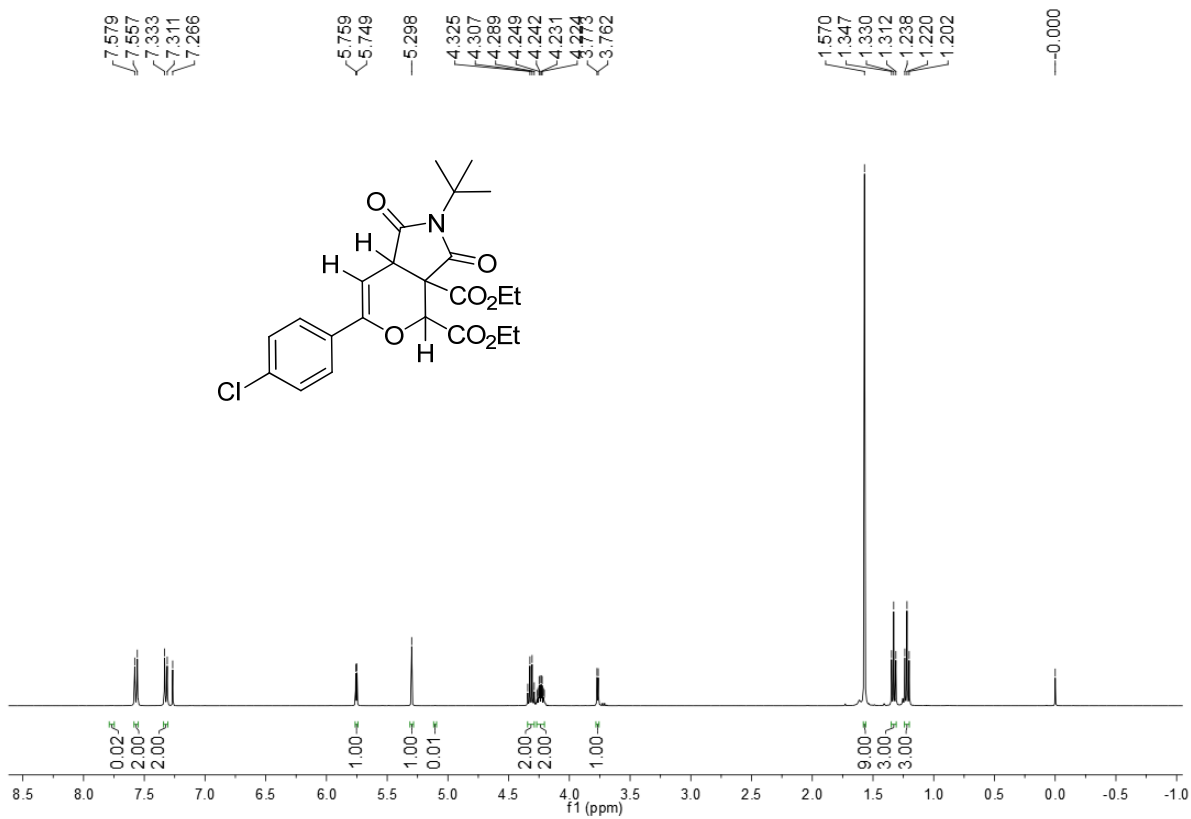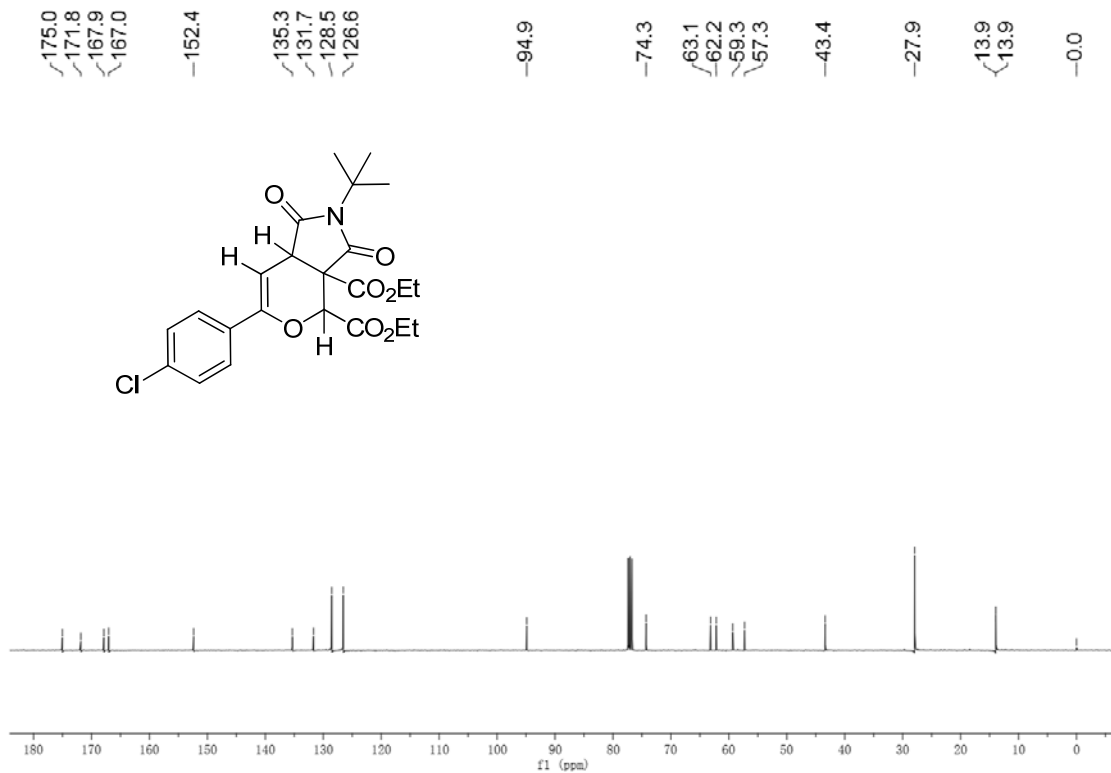

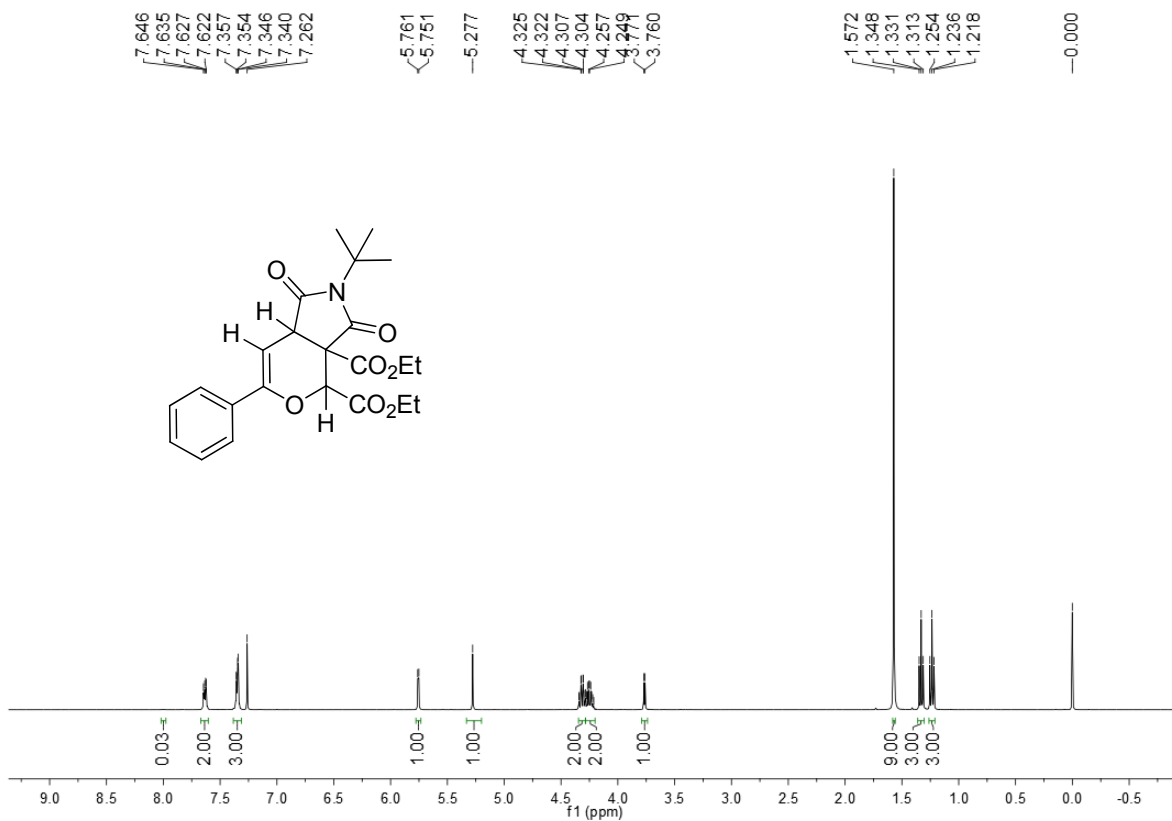

**<sup>1</sup>H NMR Spectrum of Compound 4f**

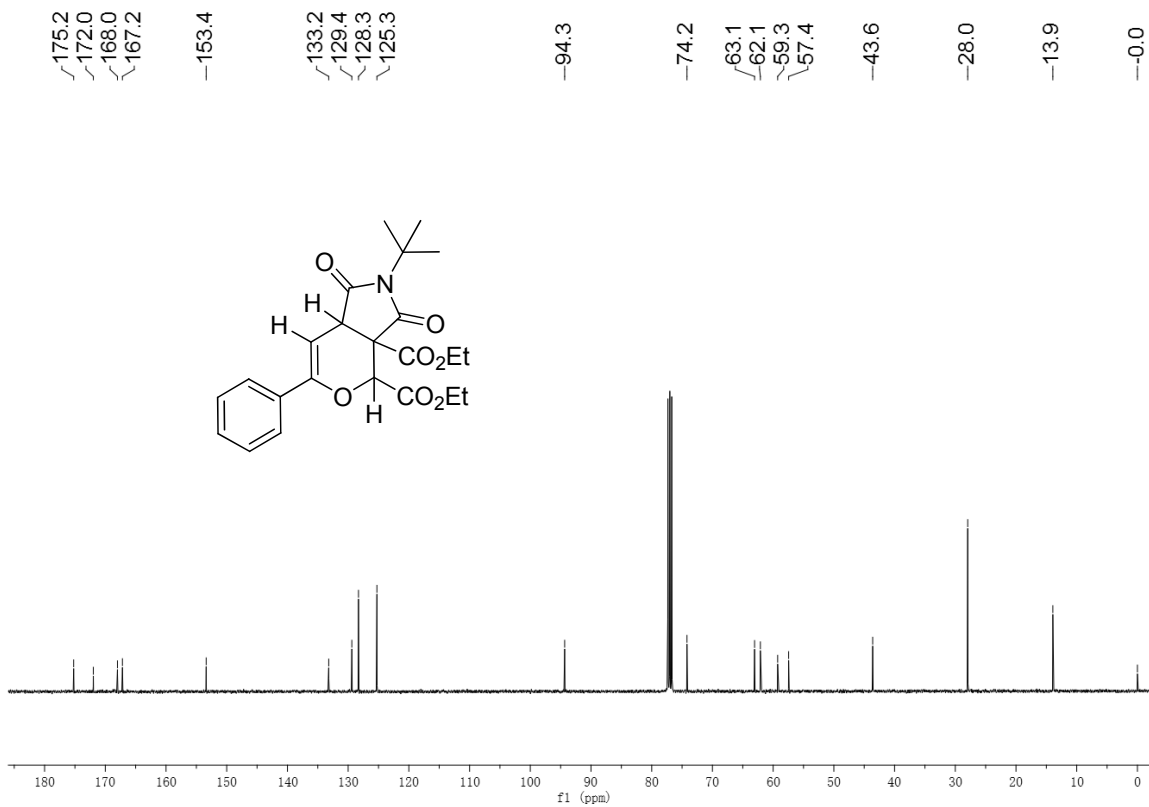

**<sup>13</sup>C NMR Spectrum of Compound 4f**

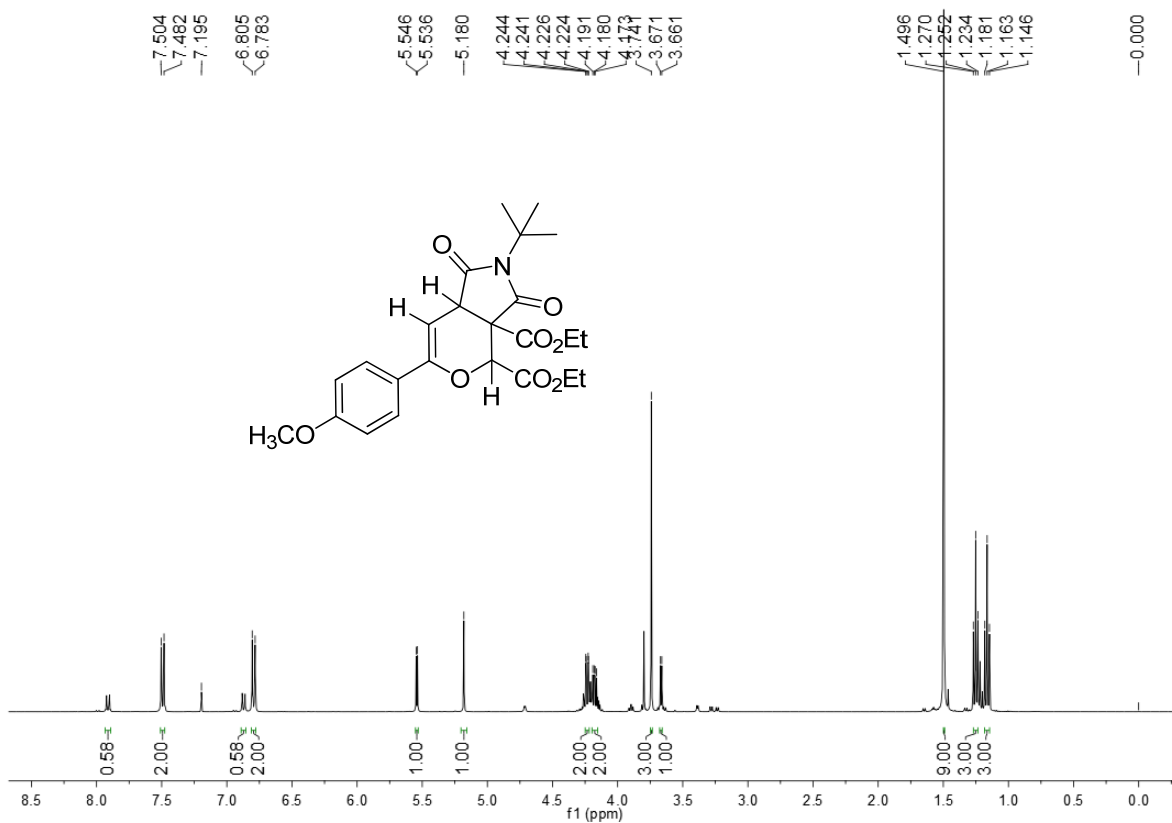

**<sup>1</sup>H NMR Spectrum of Compound 4g**

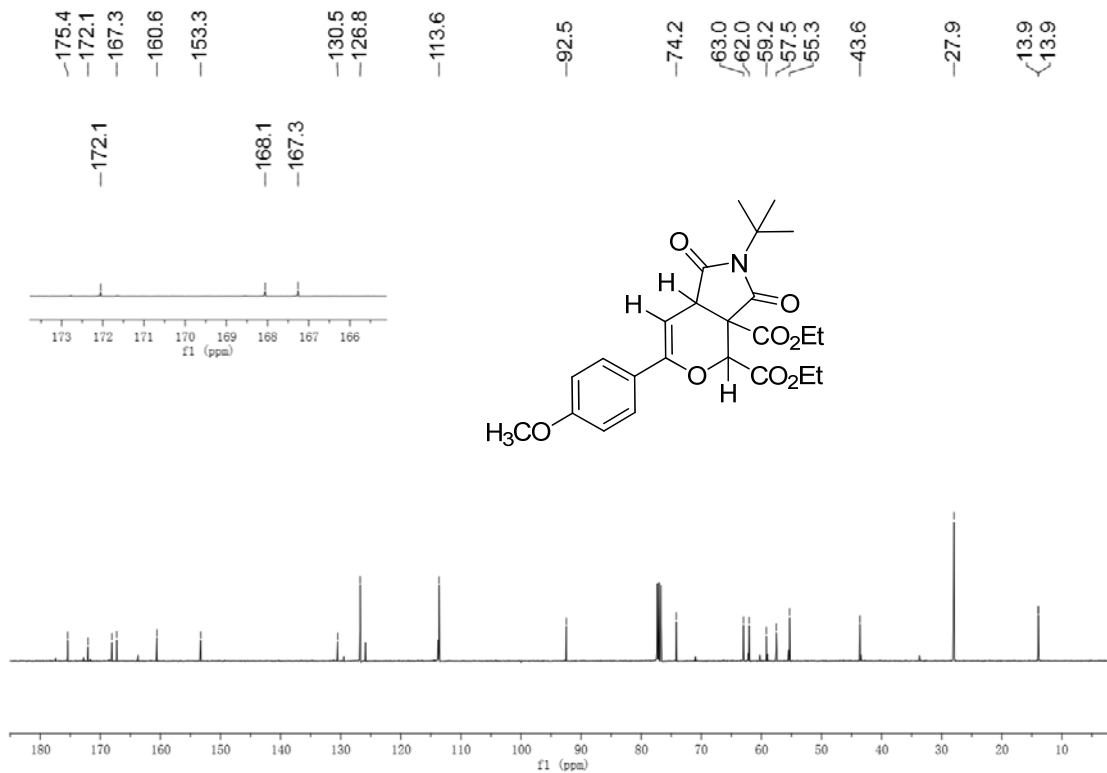

**<sup>13</sup>C NMR Spectrum of Compound 4g**

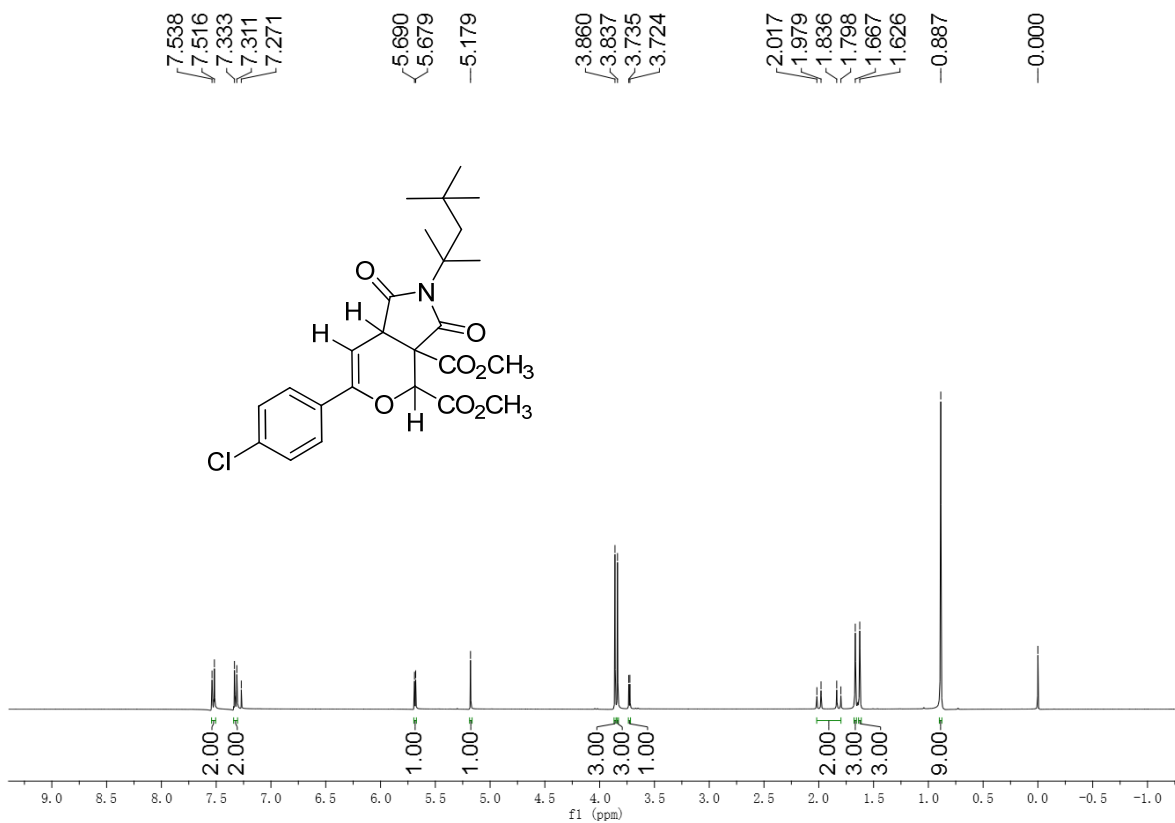

<sup>1</sup>H NMR Spectrum of Compound 4h

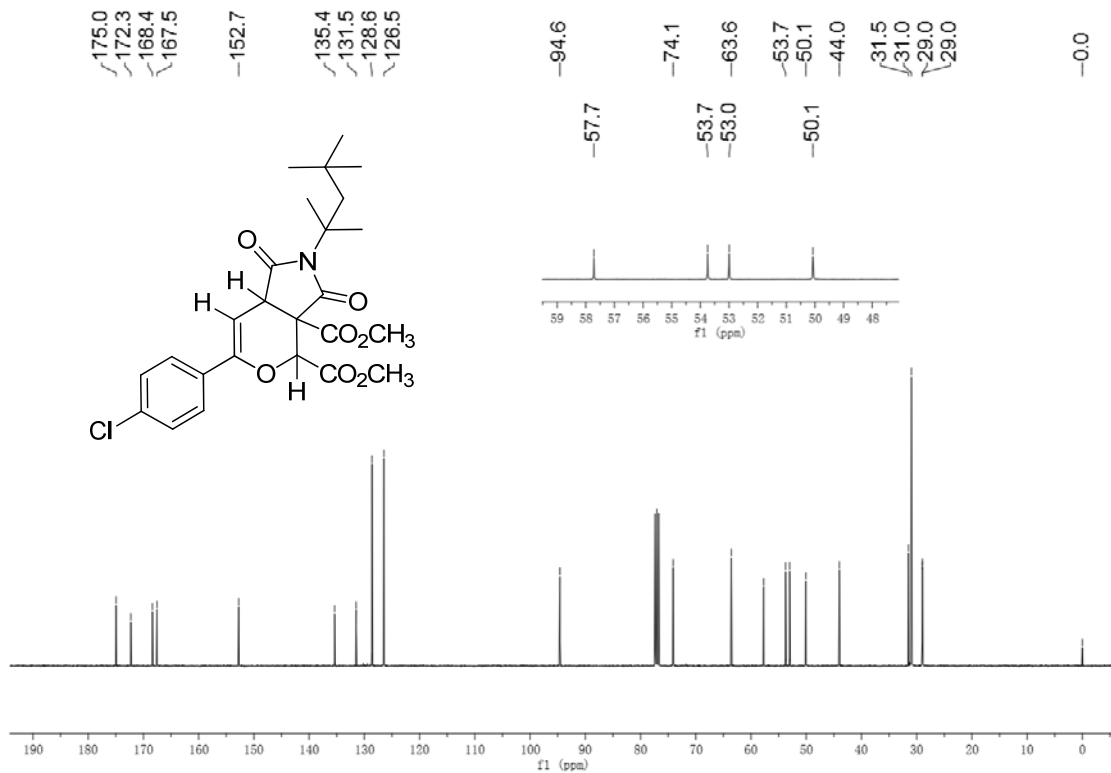

<sup>13</sup>C NMR Spectrum of Compound 4h

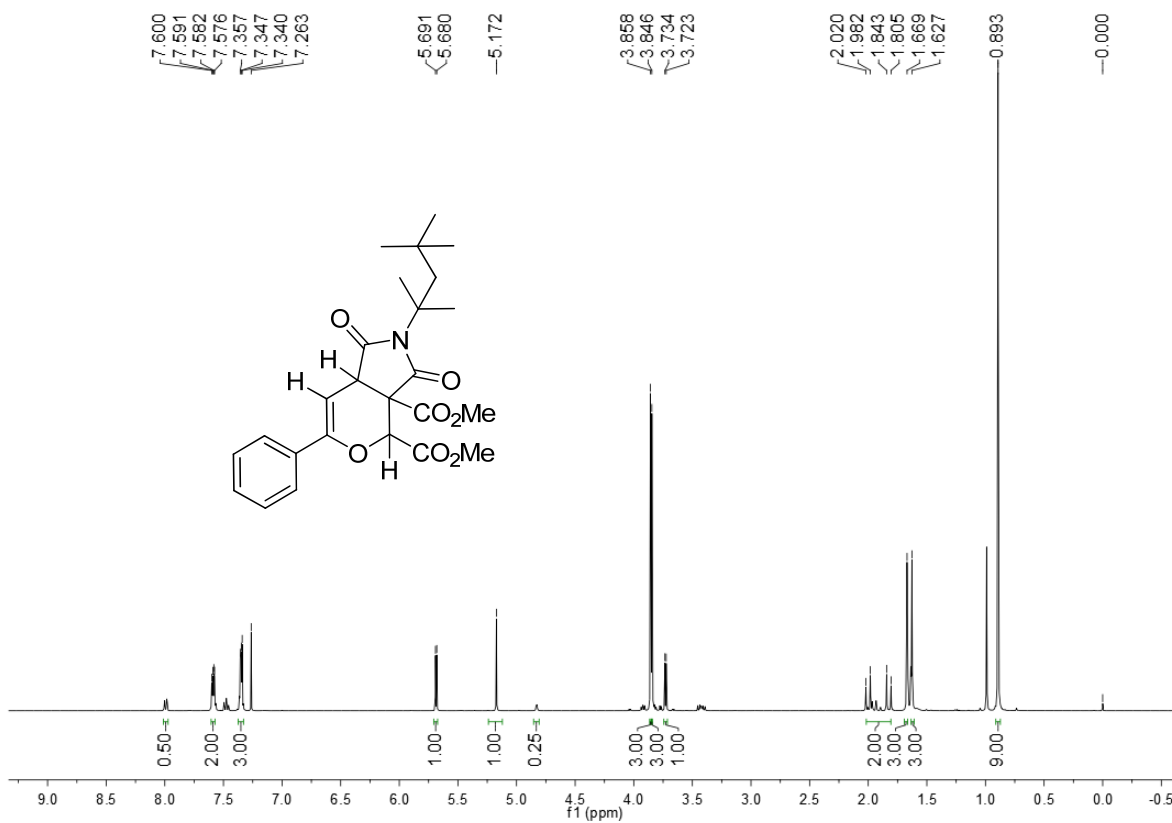

**<sup>1</sup>H NMR Spectrum of Compound 4i**

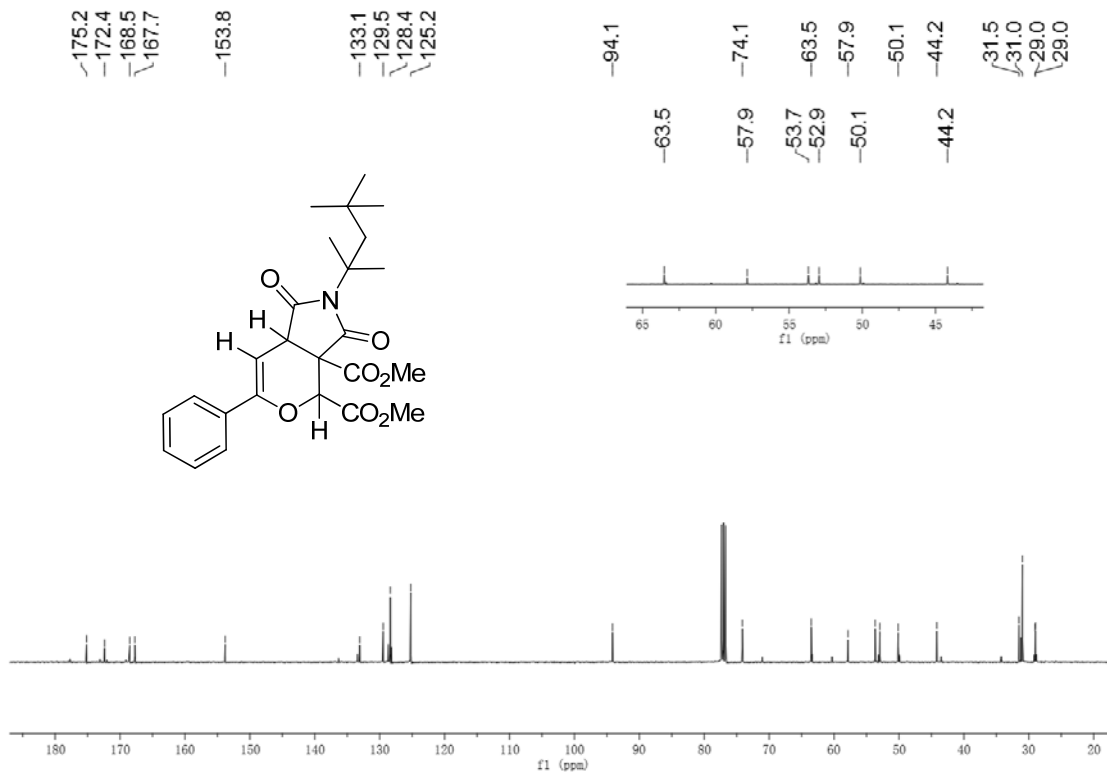

**<sup>13</sup>C NMR Spectrum of Compound 4i**

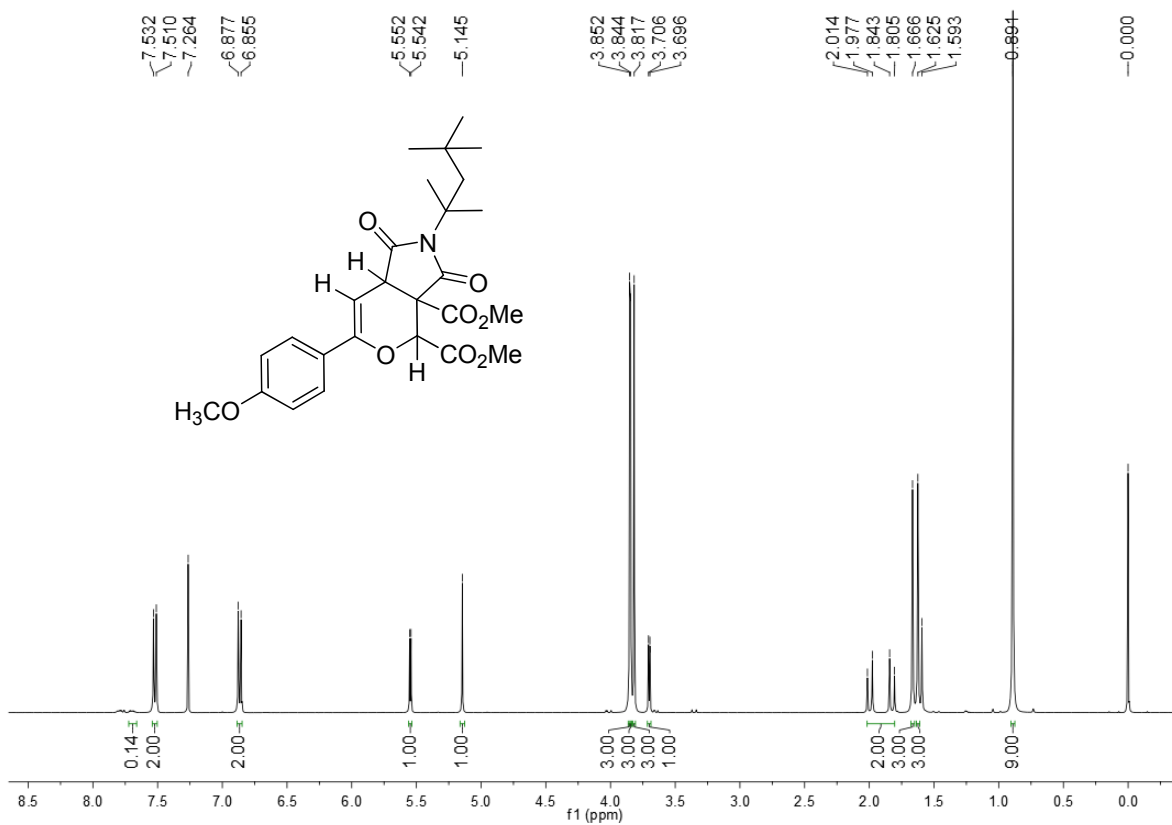

**<sup>1</sup>H NMR Spectrum of Compound 4j**

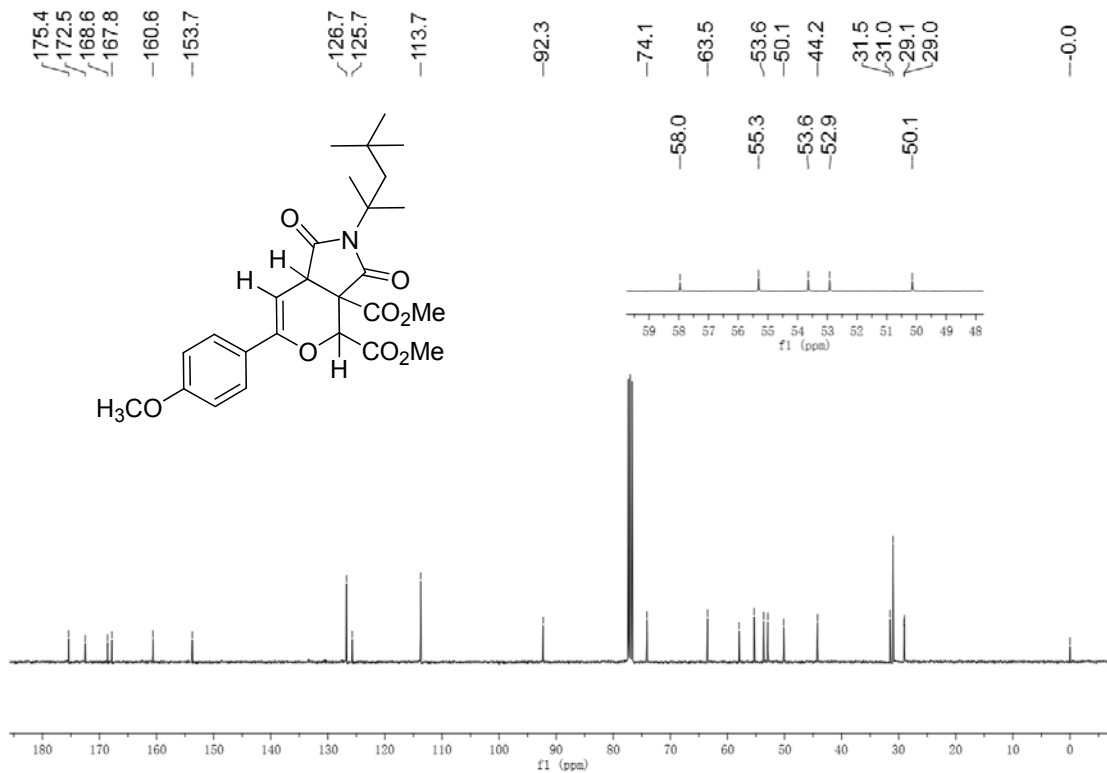

**<sup>13</sup>C NMR Spectrum of Compound 4j**

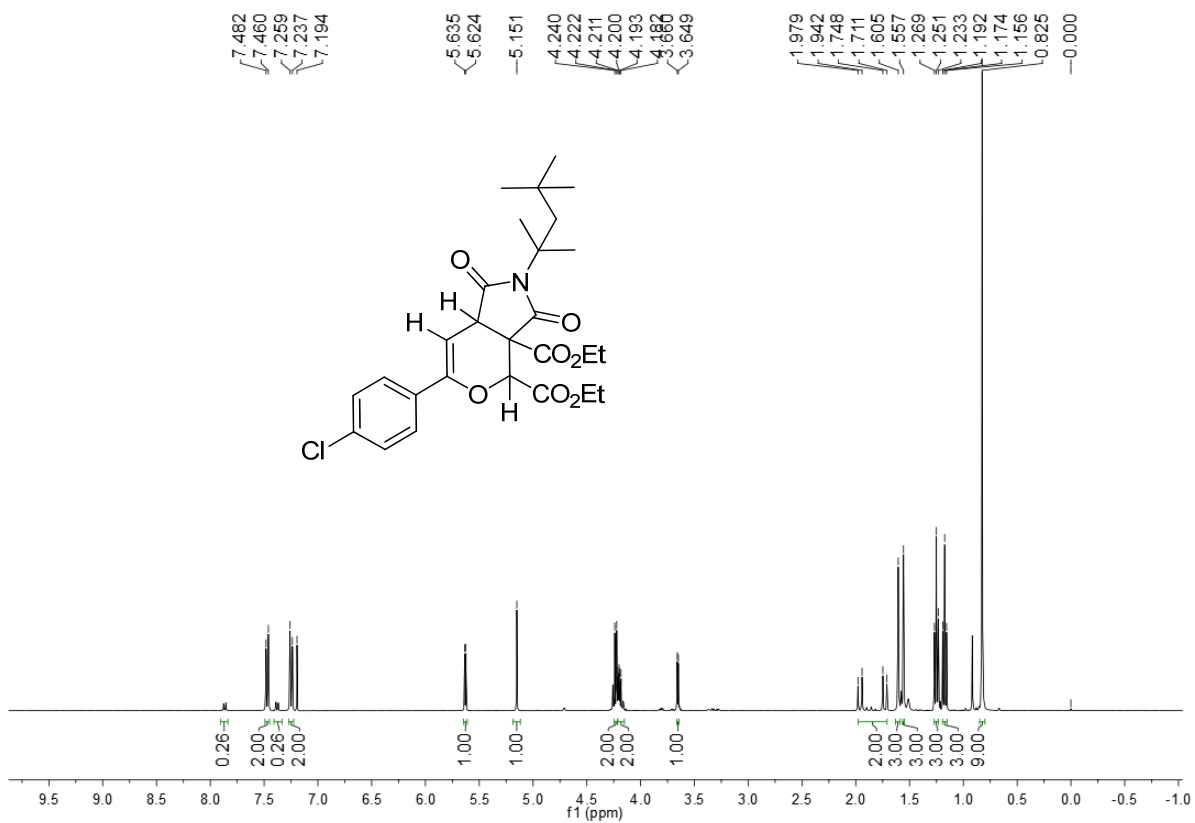

**<sup>1</sup>H NMR Spectrum of Compound 4k**

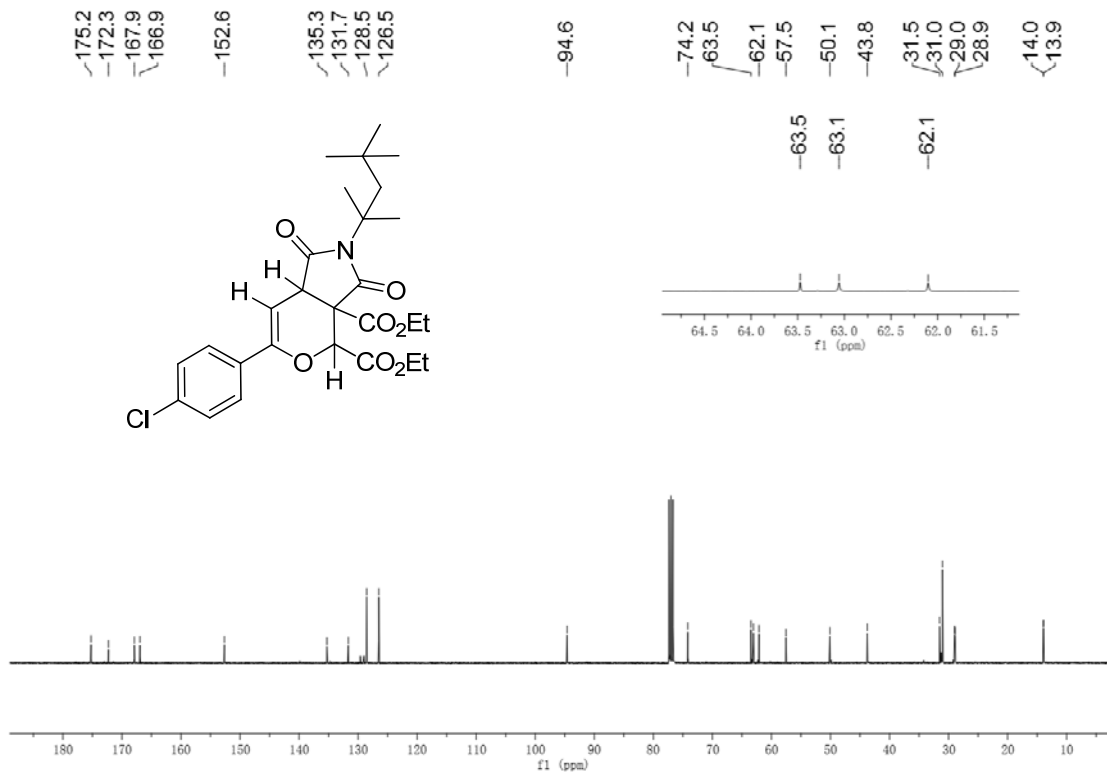

**<sup>13</sup>C NMR Spectrum of Compound 4k**



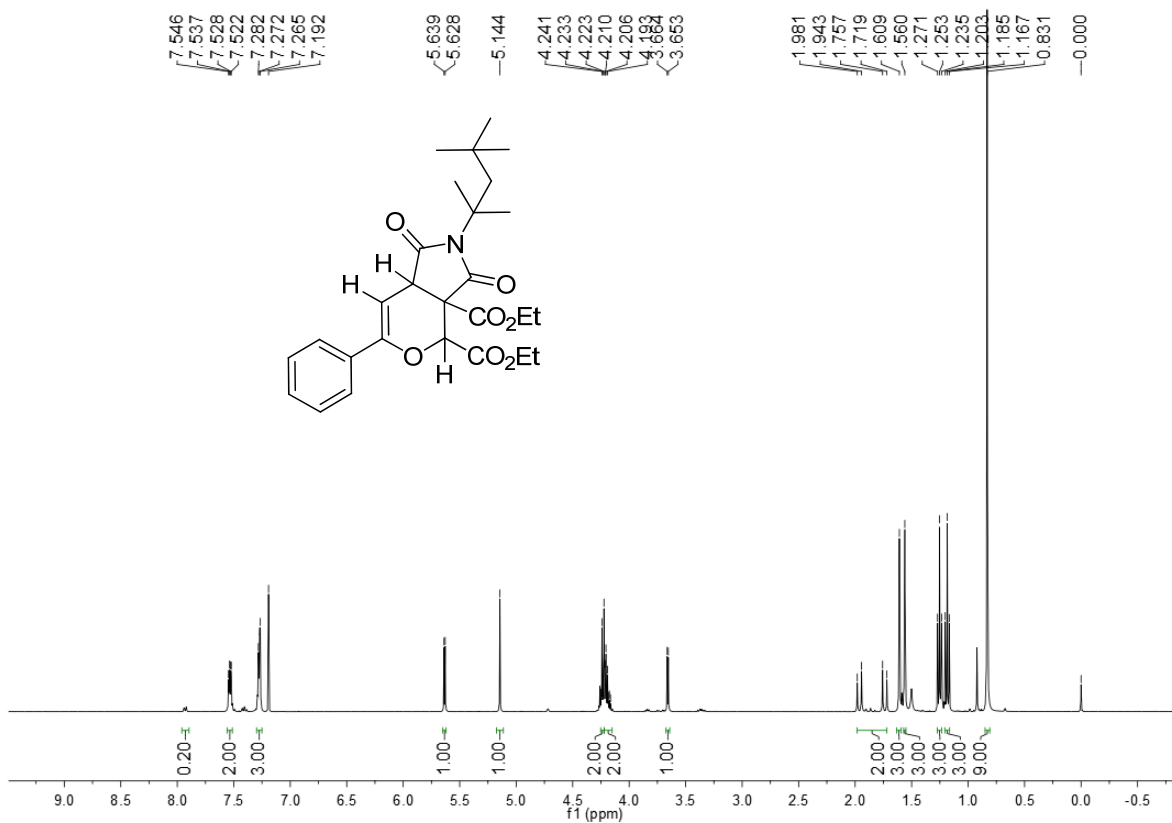

**<sup>1</sup>H NMR Spectrum of Compound 4l**

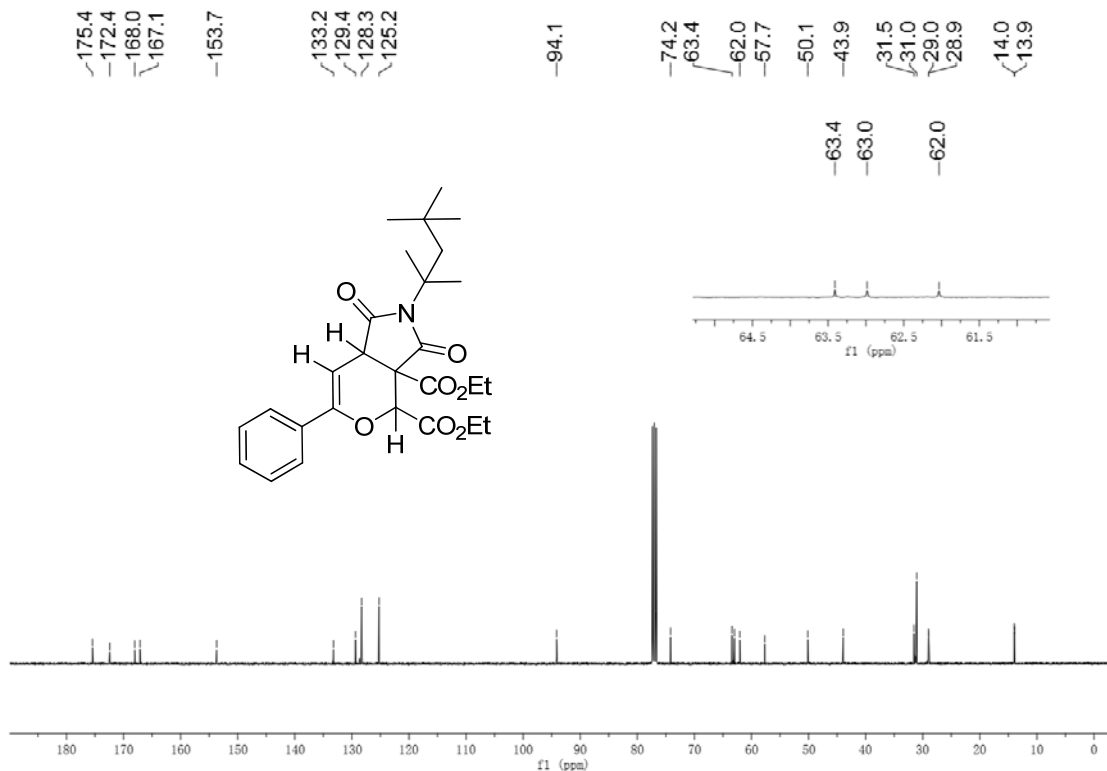

**<sup>13</sup>C NMR Spectrum of Compound 4l**

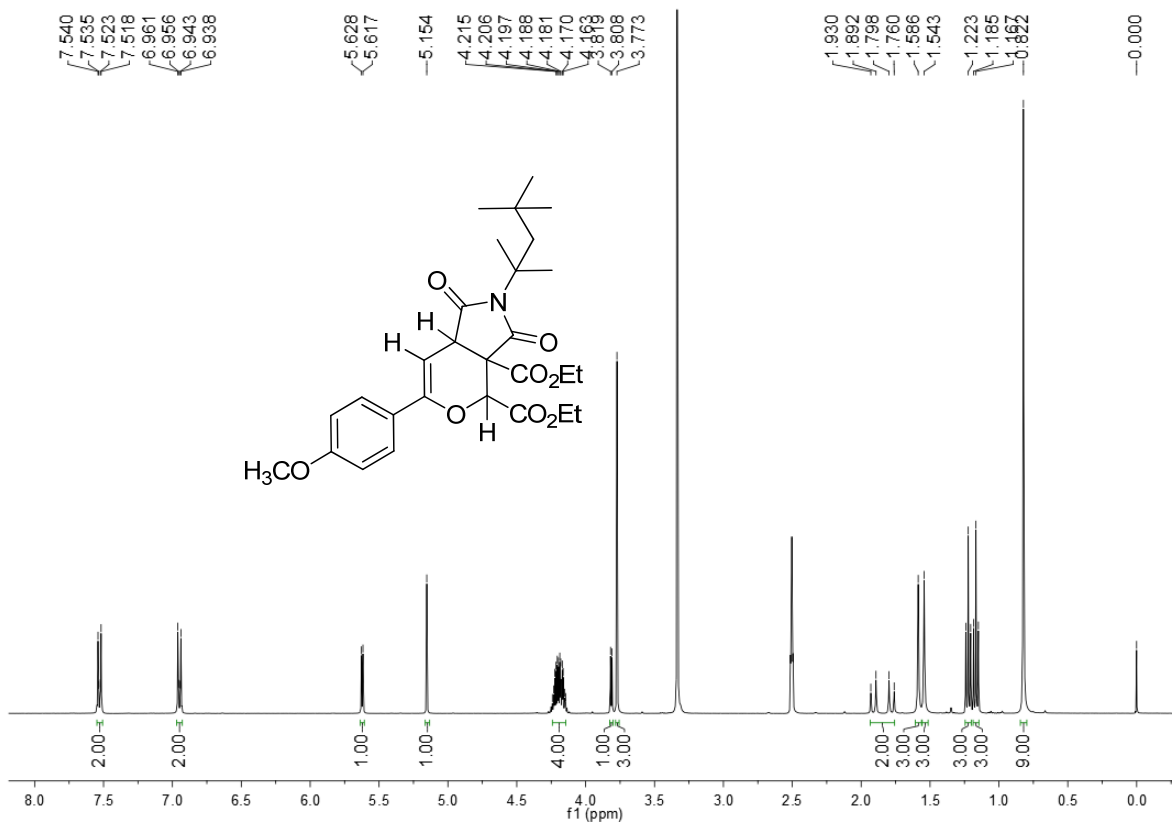

**<sup>1</sup>H NMR Spectrum of Compound 4m**

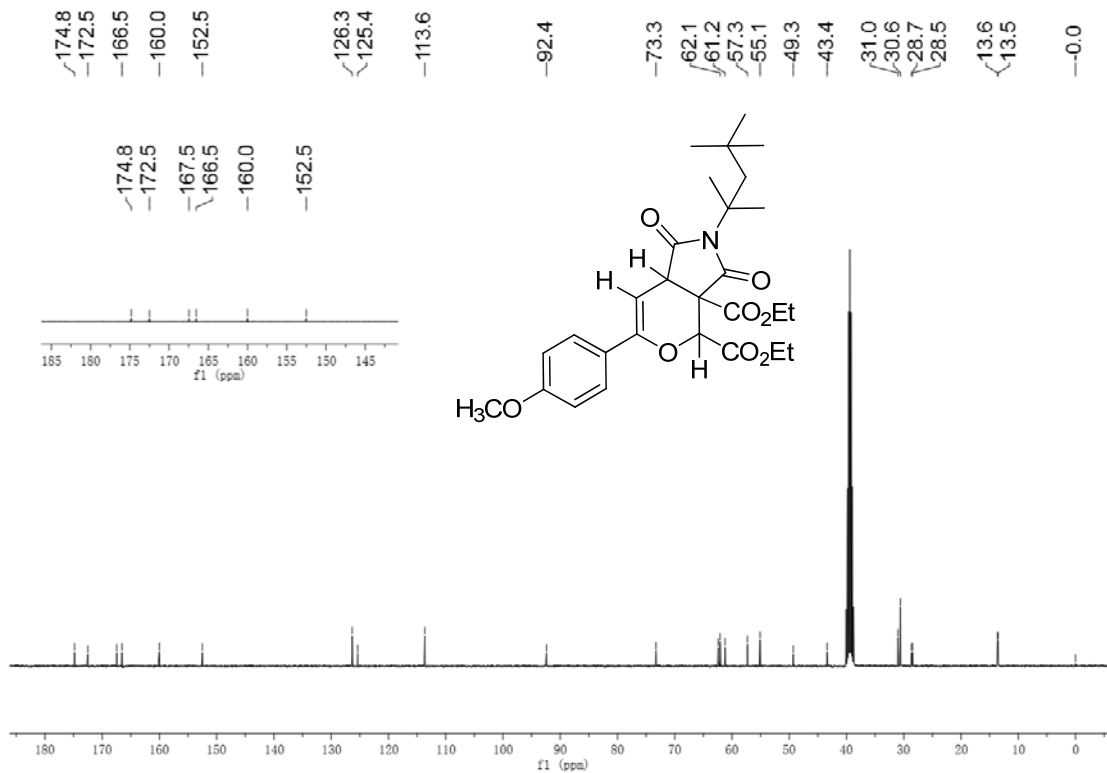

**<sup>13</sup>C NMR Spectrum of Compound 4m**

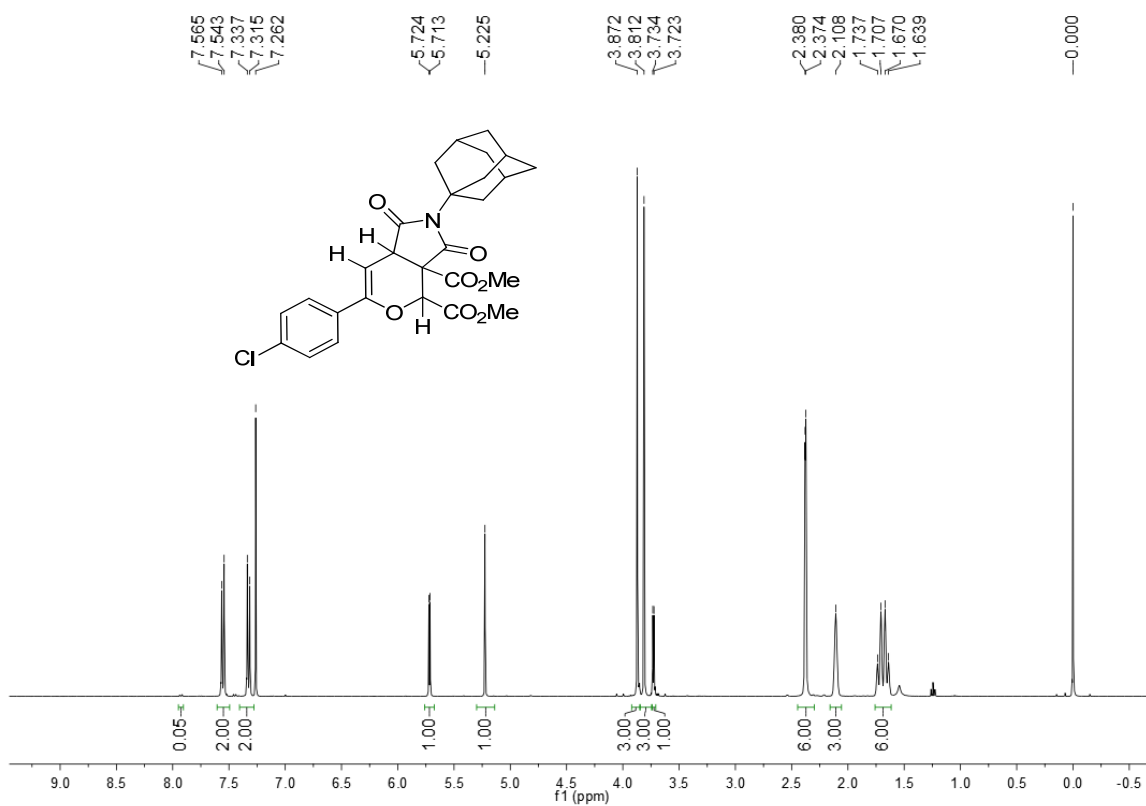

**<sup>1</sup>H NMR Spectrum of Compound 4n**

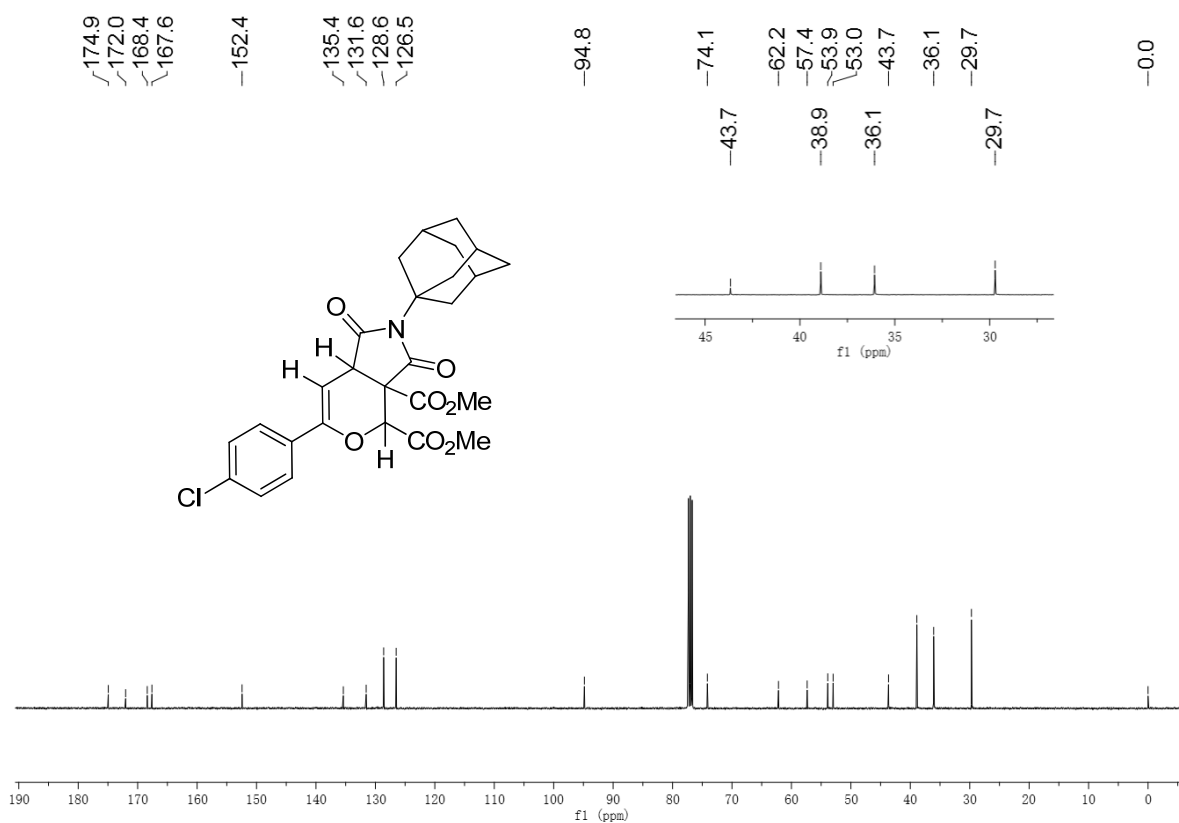

**<sup>13</sup>C NMR Spectrum of Compound 4n**

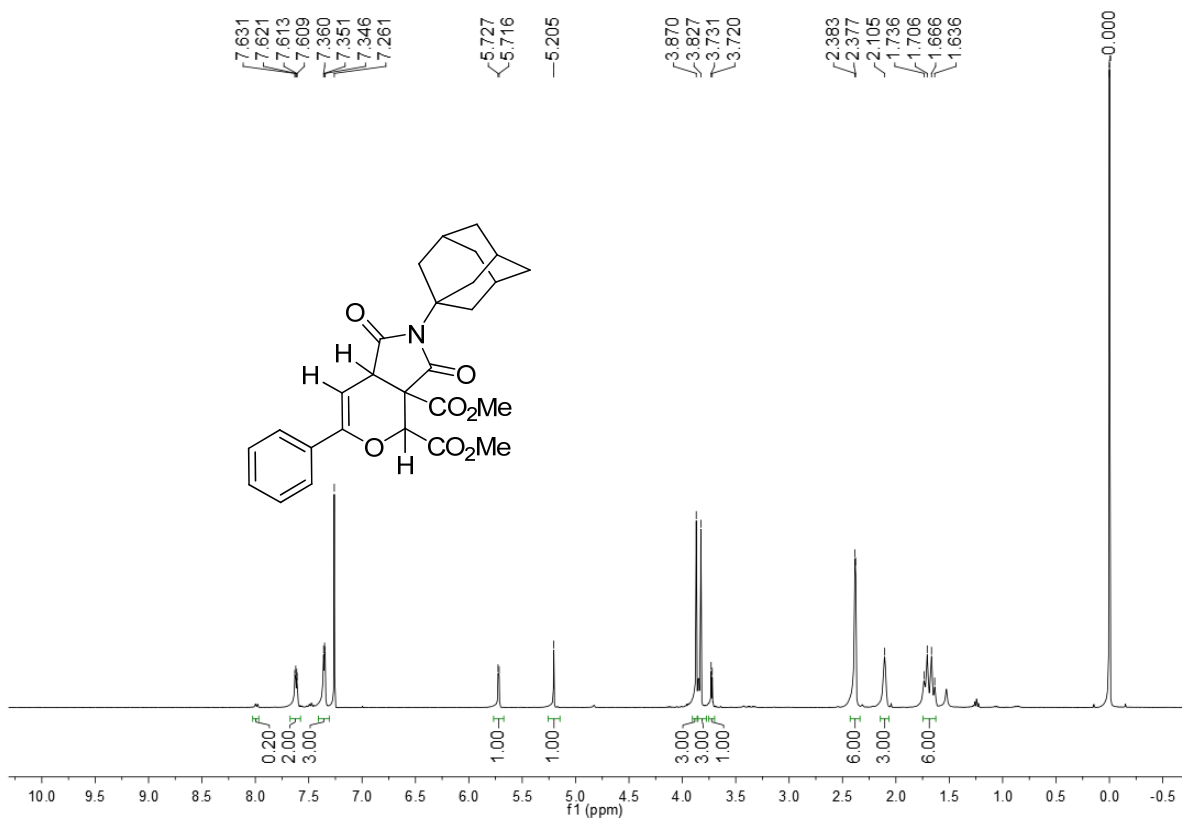

**<sup>1</sup>H NMR Spectrum of Compound 4o**

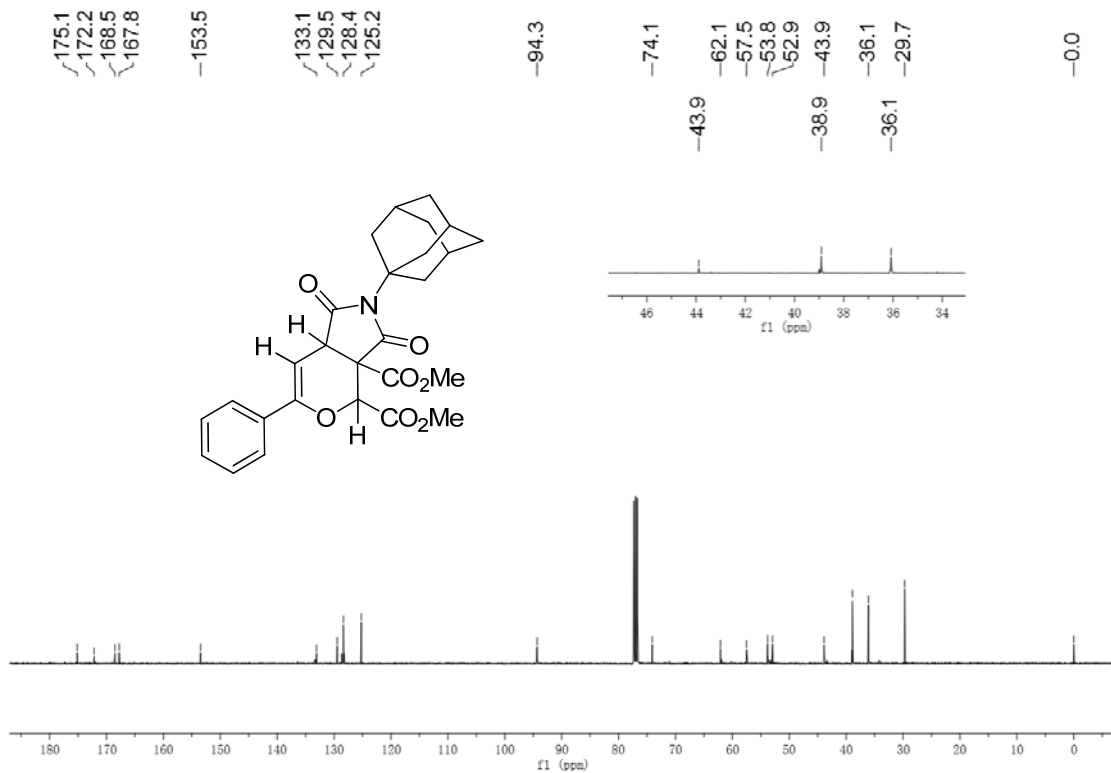

**<sup>13</sup>C NMR Spectrum of Compound 4o**

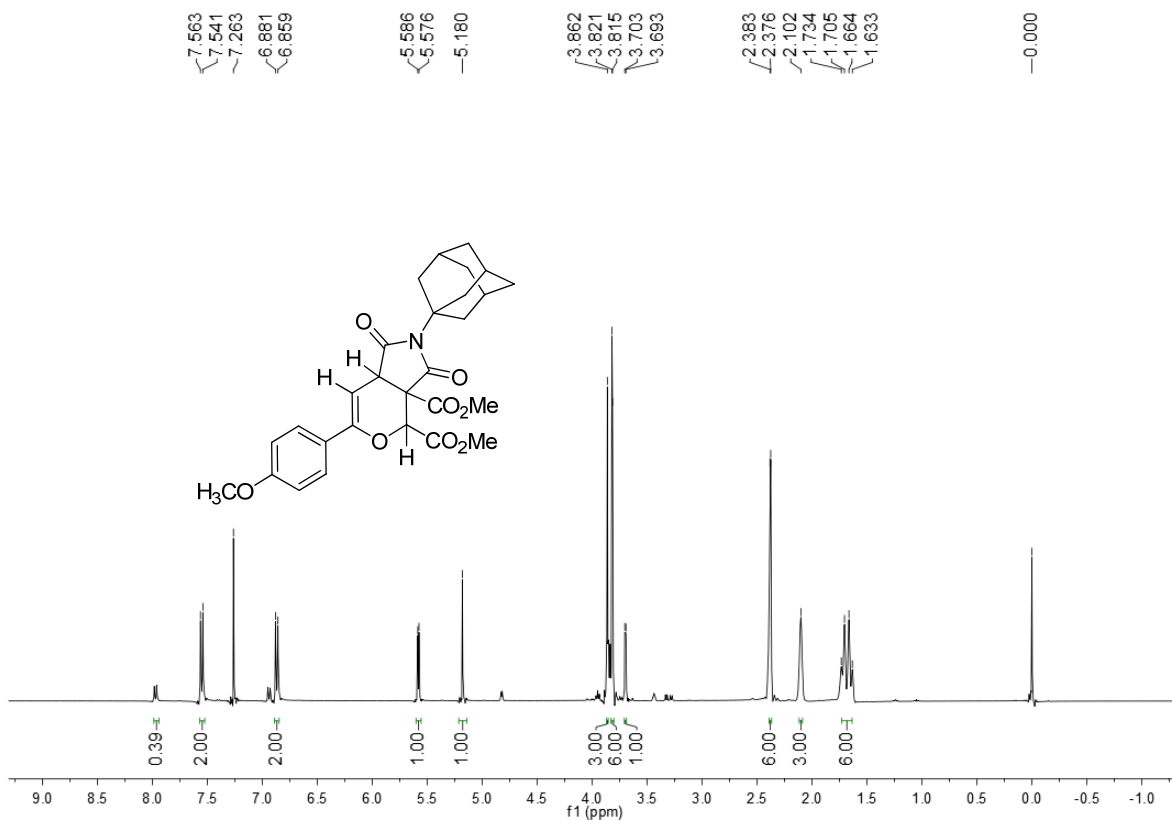

**<sup>1</sup>H NMR Spectrum of Compound 4p**

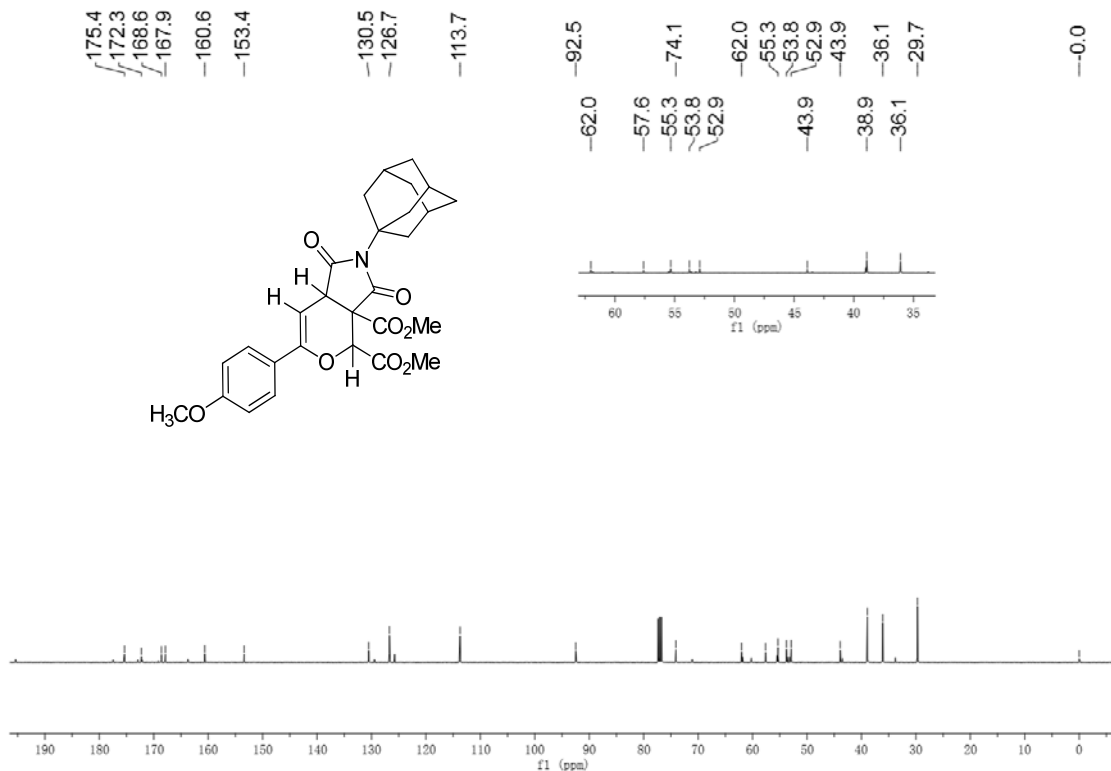

**<sup>13</sup>C NMR Spectrum of Compound 4p**

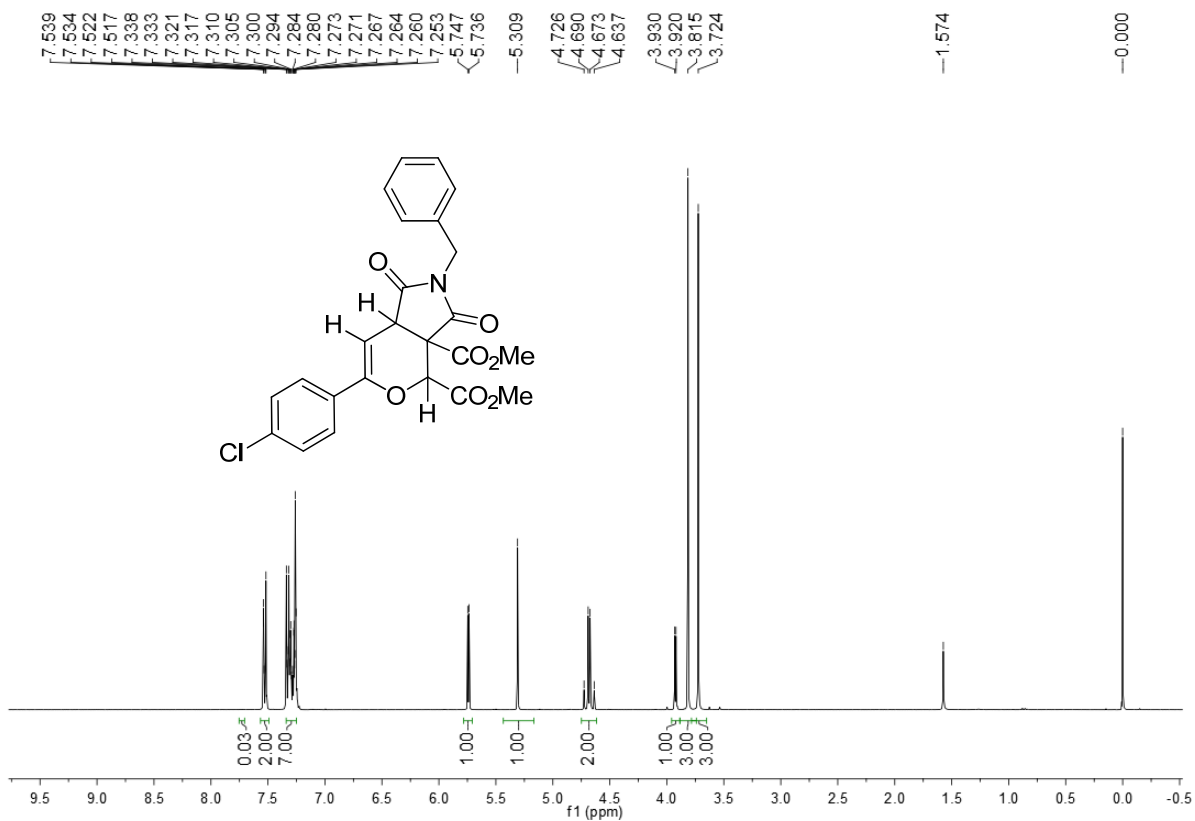

**<sup>1</sup>H NMR Spectrum of Compound 4q**

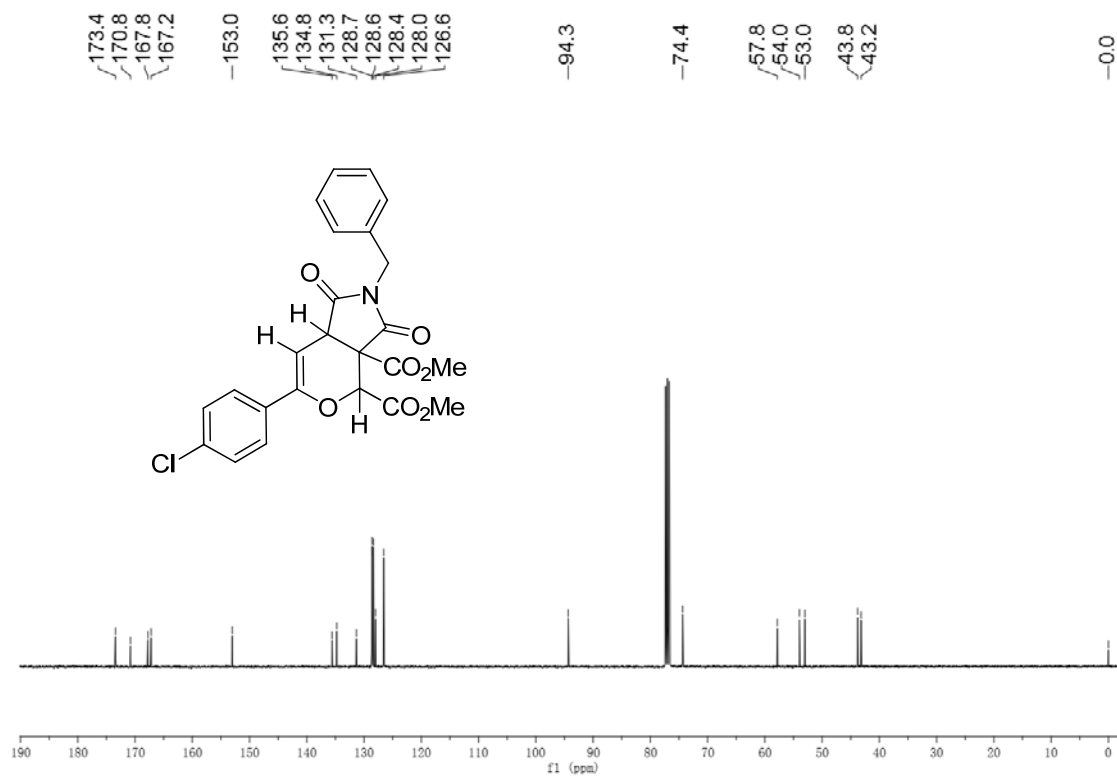

**<sup>13</sup>C NMR Spectrum of Compound 4q**

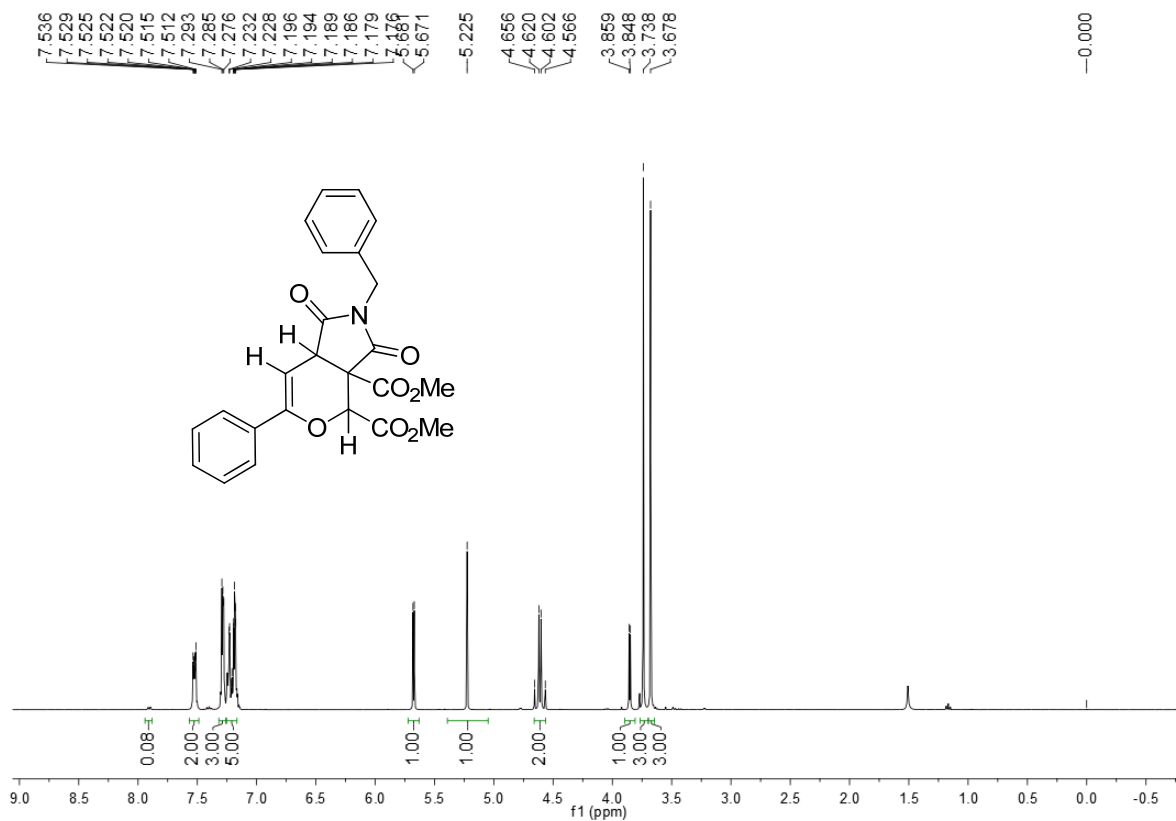

**<sup>1</sup>H NMR Spectrum of Compound 4r**

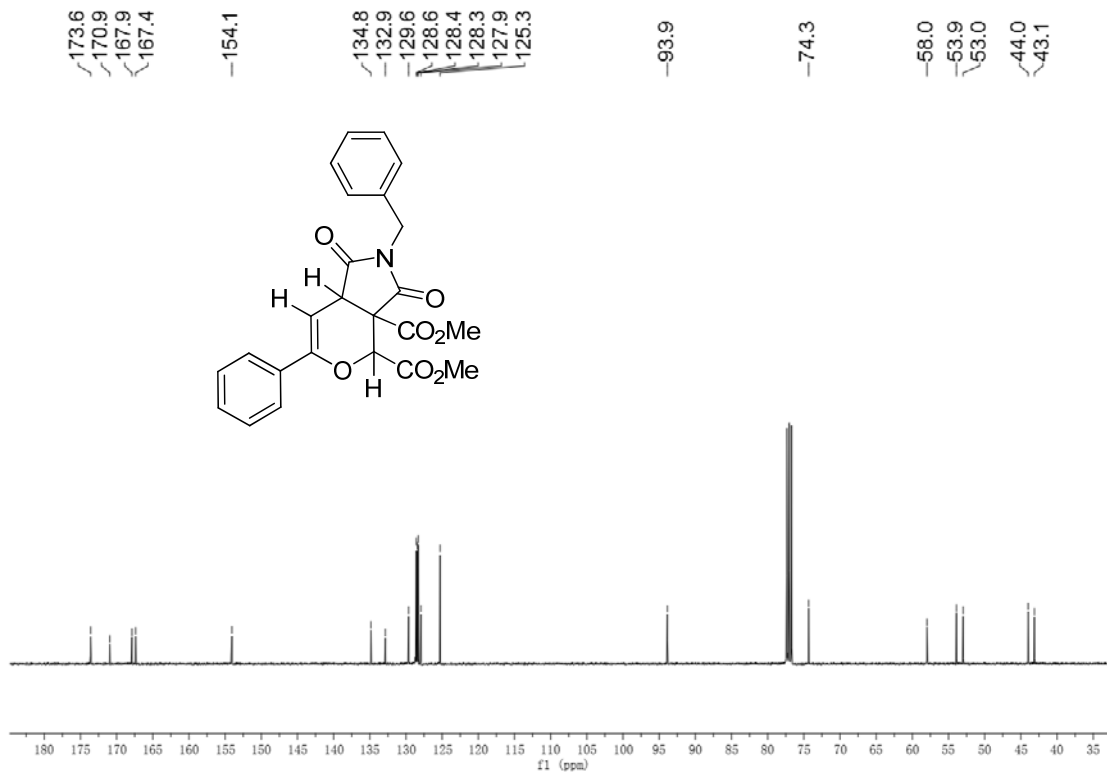

**<sup>13</sup>C NMR Spectrum of Compound 4r**

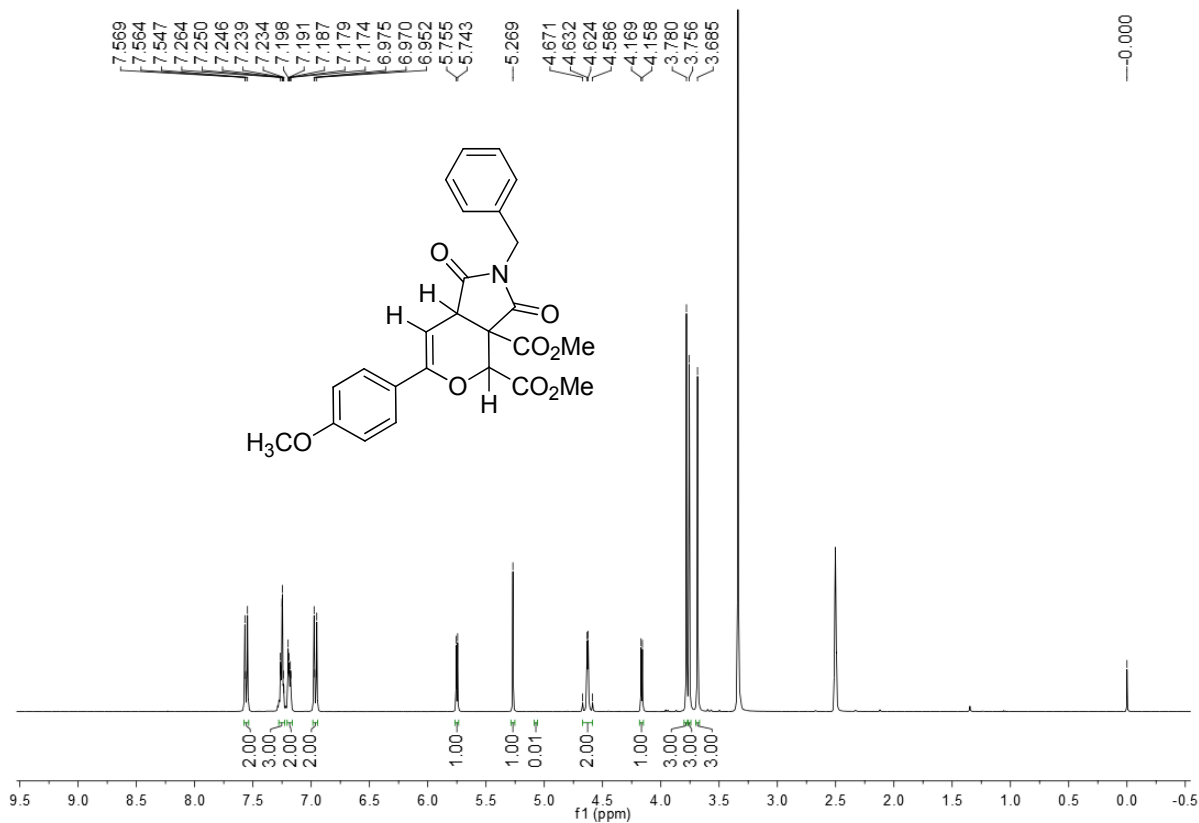

**<sup>1</sup>H NMR Spectrum of Compound 4s**

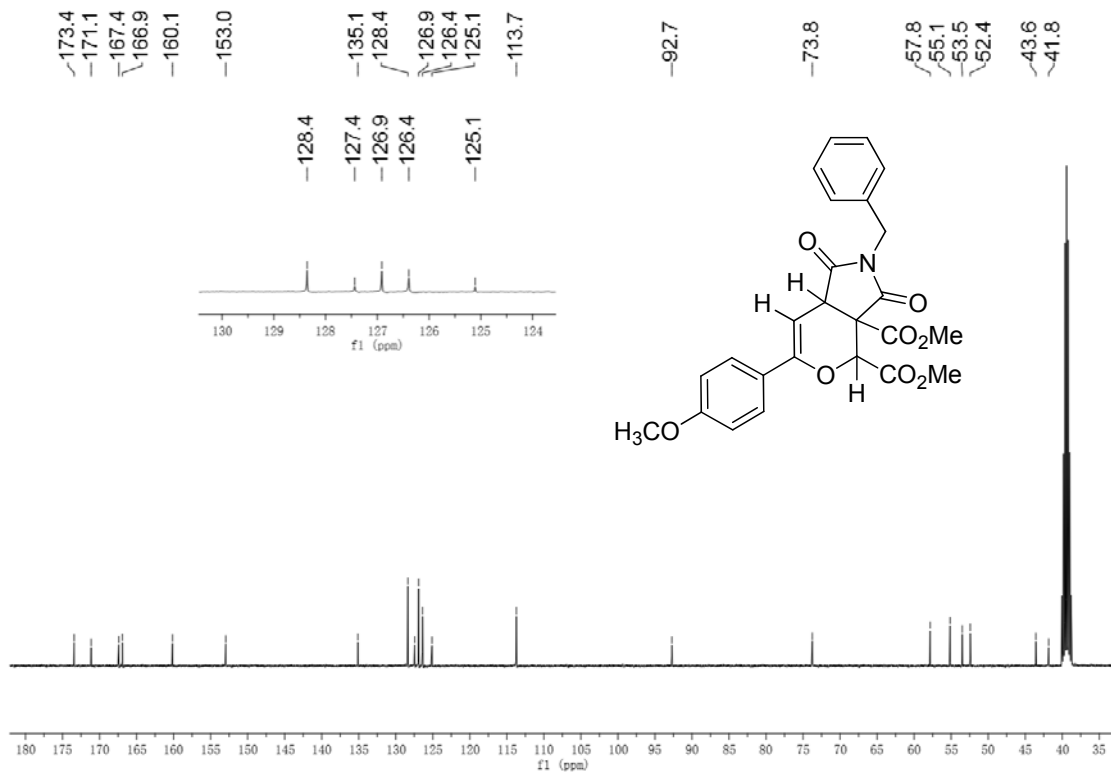

**<sup>13</sup>C NMR Spectrum of Compound 4s**



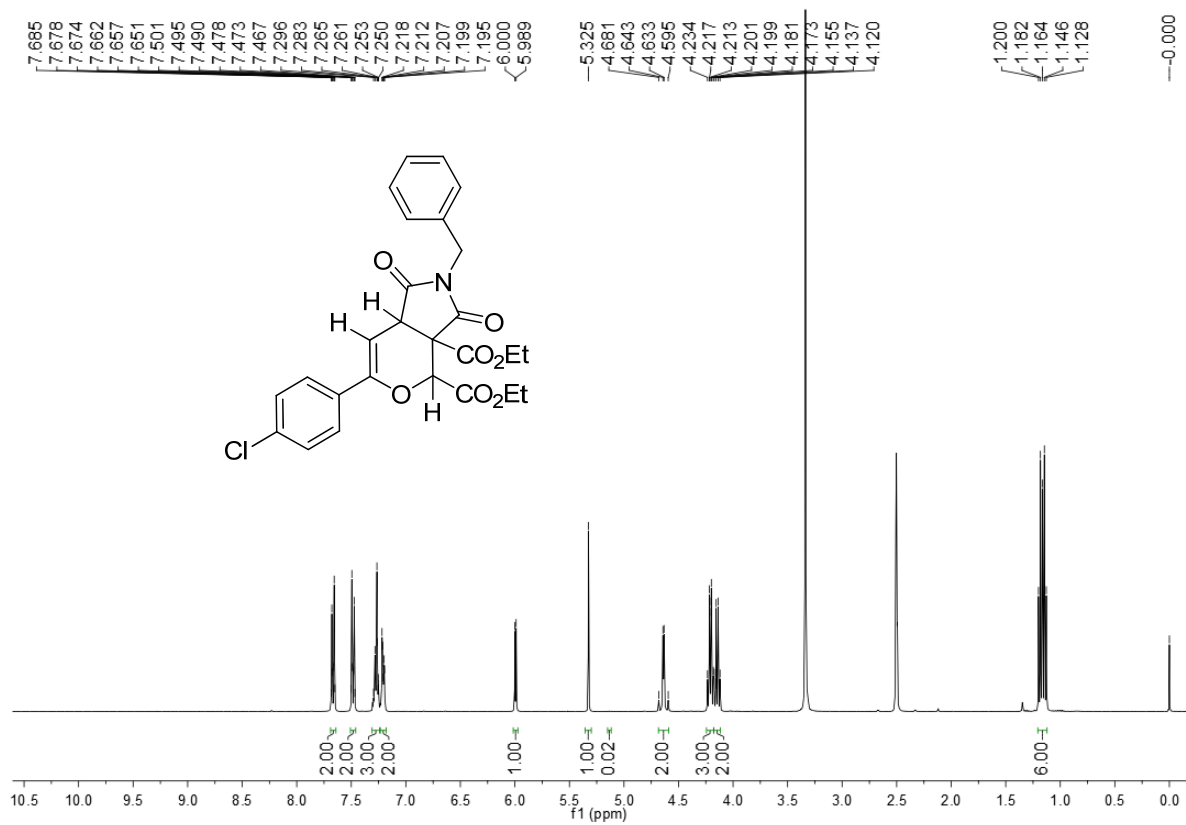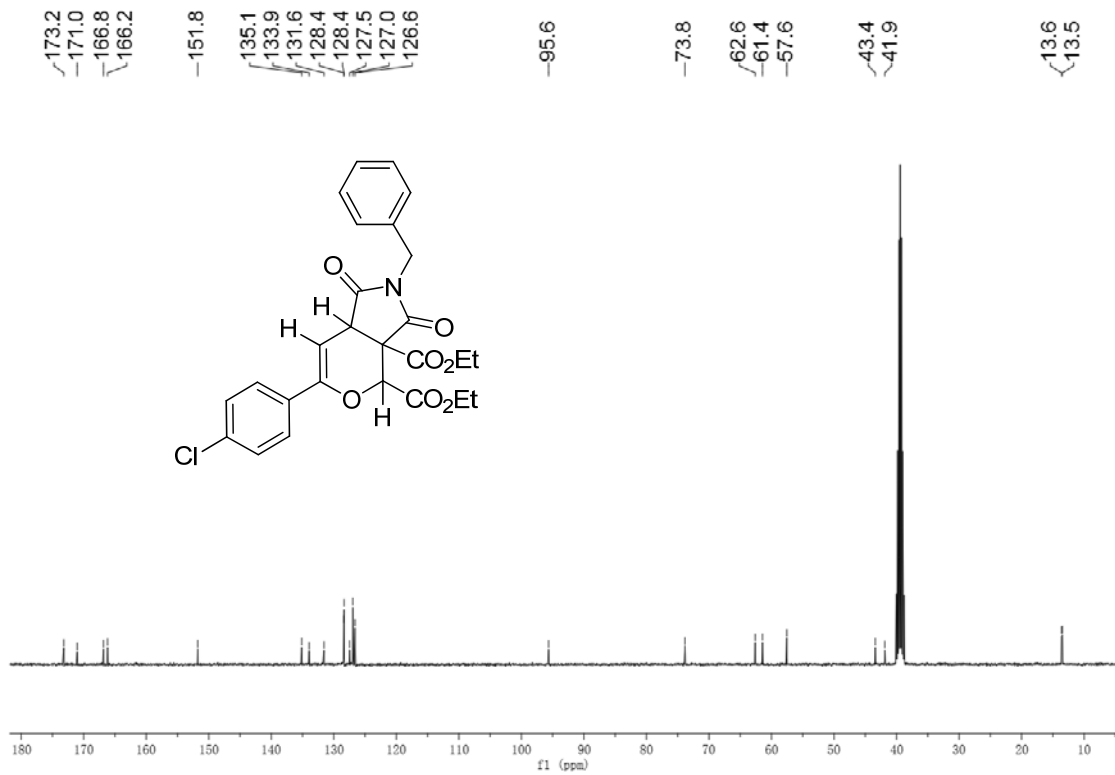

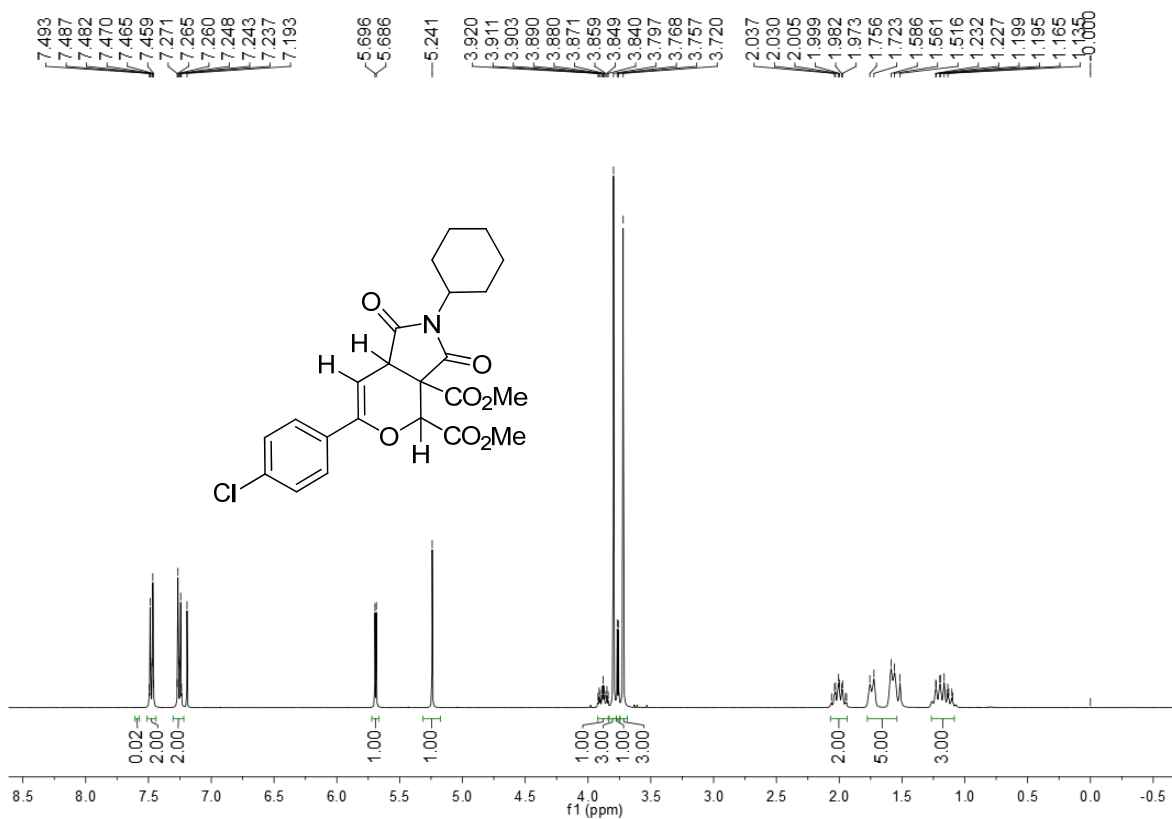

**<sup>1</sup>H NMR Spectrum of Compound 4u**

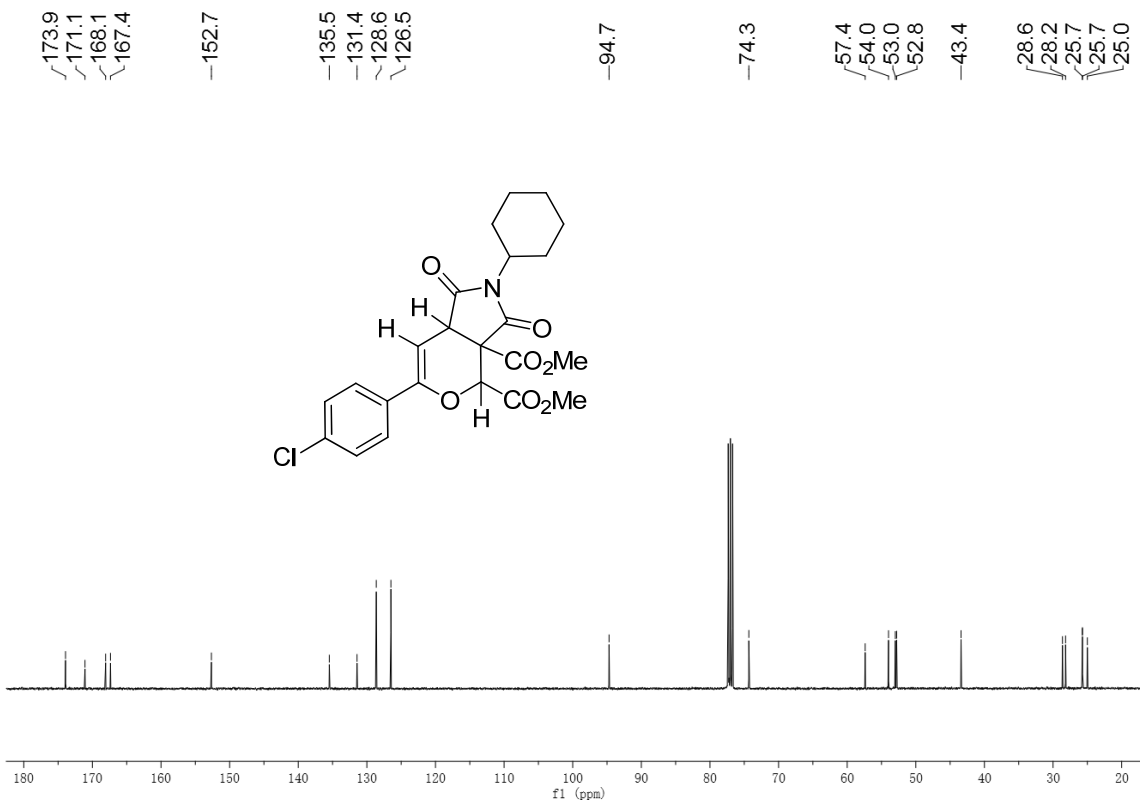

**<sup>13</sup>C NMR Spectrum of Compound 4u**

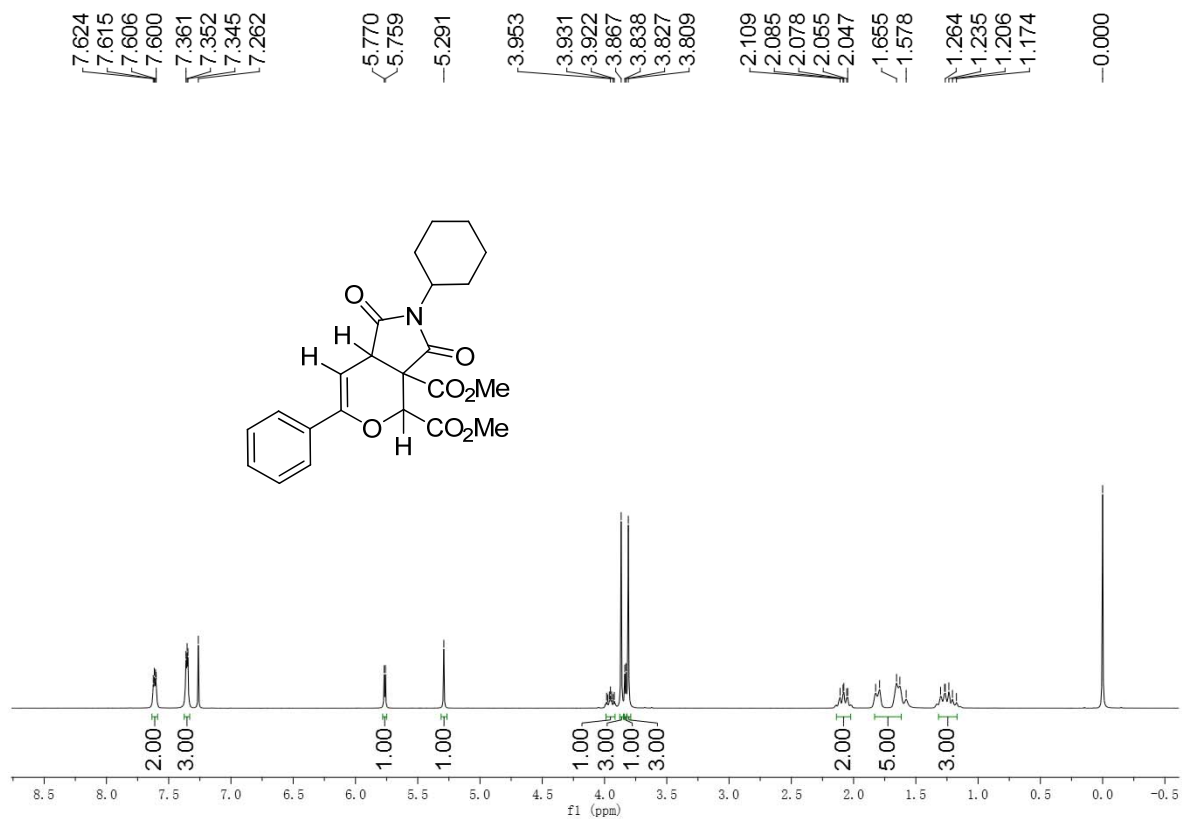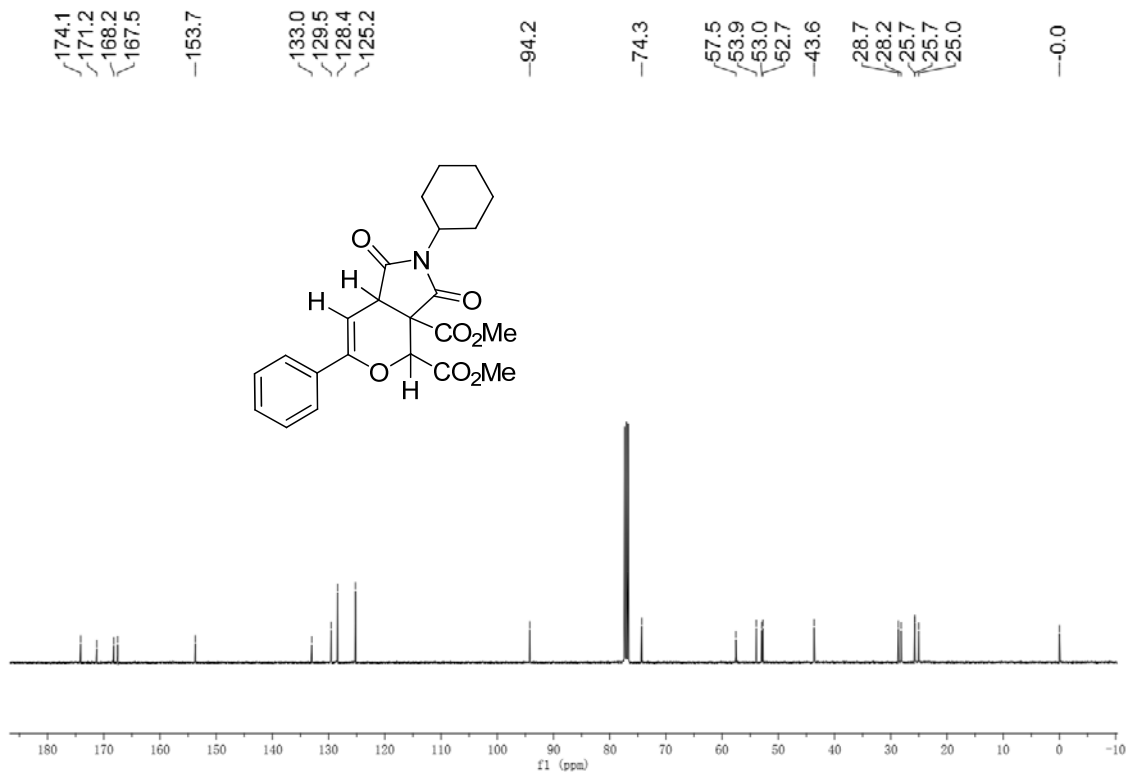

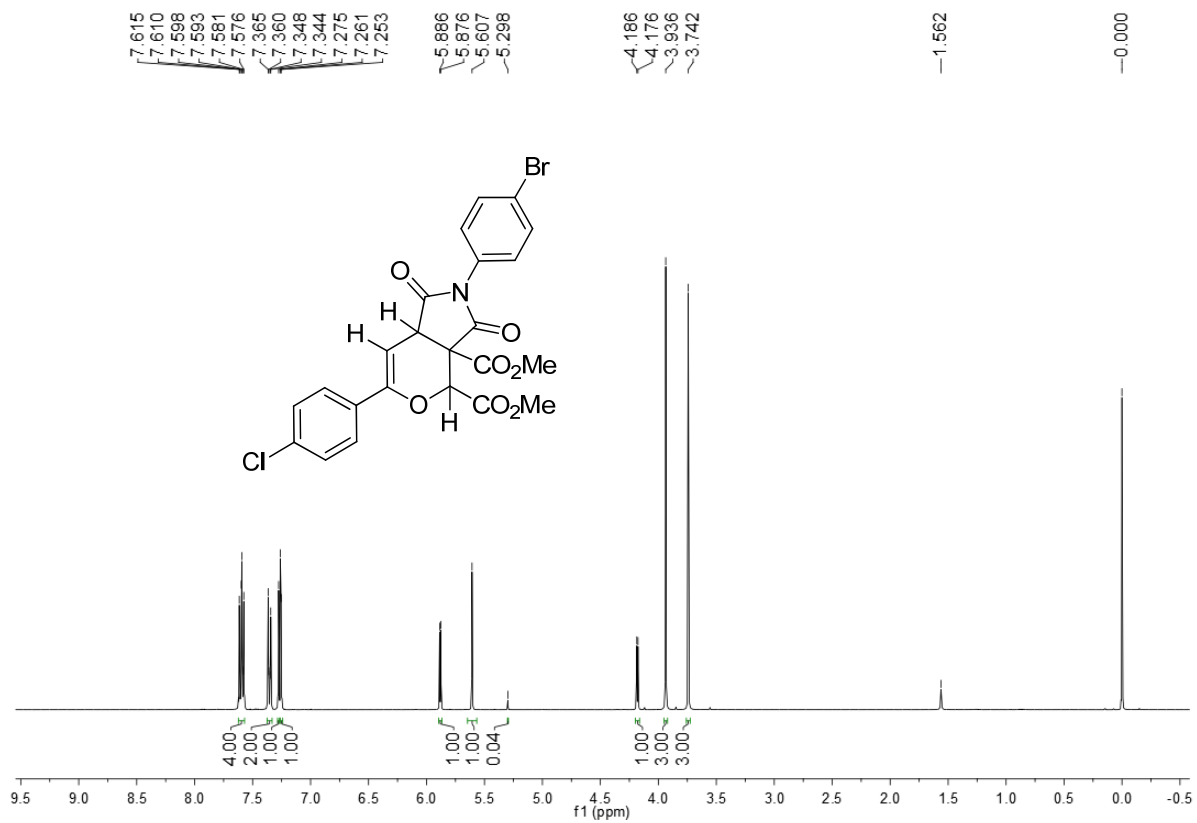

**<sup>1</sup>H NMR Spectrum of Compound 4w**

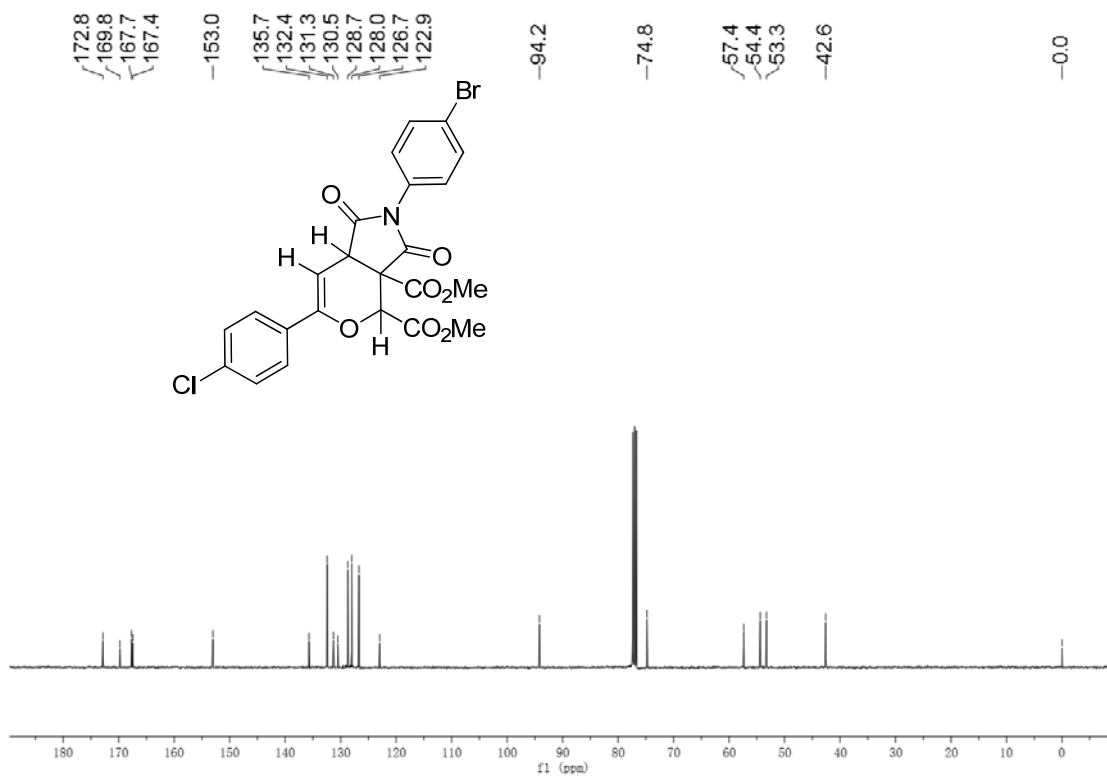

**<sup>13</sup>C NMR Spectrum of Compound 4w**
